# Supplementary material for: Cohort profile: South Australian Aboriginal Birth Cohort (SAABC)—a prospective longitudinal birth cohort
Source: PubMed Central journal article supplement — BMJ Open. 2021 Feb 22;11(2):e043559. doi: 10.1136/bmjopen-2020-043559 (PMC7903076; doi:10.1136/bmjopen-2020-043559), 2021-02-22

# BMJ Open

BMJ Open is committed to open peer review. As part of this commitment we make the peer review history of every article we publish publicly available.

When an article is published we post the peer reviewers' comments and the authors' responses online. We also post the versions of the paper that were used during peer review. These are the versions that the peer review comments apply to.

The versions of the paper that follow are the versions that were submitted during the peer review process. They are not the versions of record or the final published versions. They should not be cited or distributed as the published version of this manuscript.

BMJ Open is an open access journal and the full, final, typeset and author-corrected version of record of the manuscript is available on our site with no access controls, subscription charges or pay-per-view fees (<http://bmjopen.bmj.com>).

If you have any questions on BMJ Open's open peer review process please email [info.bmjopen@bmj.com](mailto:info.bmjopen@bmj.com)

# BMJ Open

## Cohort Profile: South Australian Aboriginal Birth Cohort (SAABC); a prospective longitudinal birth cohort

|                               |                                                                                                                                                                                                                                                                                                                                                                                                                                                                                                                                                                                                                                                                                                                                                                                                                                                                                                                                                                                                  |
|-------------------------------|--------------------------------------------------------------------------------------------------------------------------------------------------------------------------------------------------------------------------------------------------------------------------------------------------------------------------------------------------------------------------------------------------------------------------------------------------------------------------------------------------------------------------------------------------------------------------------------------------------------------------------------------------------------------------------------------------------------------------------------------------------------------------------------------------------------------------------------------------------------------------------------------------------------------------------------------------------------------------------------------------|
| Journal:                      | <i>BMJ Open</i>                                                                                                                                                                                                                                                                                                                                                                                                                                                                                                                                                                                                                                                                                                                                                                                                                                                                                                                                                                                  |
| Manuscript ID                 | bmjopen-2020-043559                                                                                                                                                                                                                                                                                                                                                                                                                                                                                                                                                                                                                                                                                                                                                                                                                                                                                                                                                                              |
| Article Type:                 | Cohort profile                                                                                                                                                                                                                                                                                                                                                                                                                                                                                                                                                                                                                                                                                                                                                                                                                                                                                                                                                                                   |
| Date Submitted by the Author: | 10-Aug-2020                                                                                                                                                                                                                                                                                                                                                                                                                                                                                                                                                                                                                                                                                                                                                                                                                                                                                                                                                                                      |
| Complete List of Authors:     | Jamieson, Lisa M.; Australian Research Centre for Population Oral Health, The University of Adelaide<br>Hedges, Joanne; Australian Research Centre for Population Oral Health, The University of Adelaide<br>Ju, X; Australian Research Centre for Population Oral Health, The University of Adelaide<br>Kapellas, Kostas; Australian Research Centre for Population Oral Health, The University of Adelaide,<br>Haag, Dandara; The University of Adelaide, Australian Research Centre for Population Oral Health (ARCPOH), Adelaide Dental School; The University of Adelaide, Better Start Child Health and Development Research Group, School of Public Health<br>Santiago, Pedro; Australian Research Centre for Population Oral Health, The University of Adelaide<br>Macedo, Davi; Australian Research Centre for Population Oral Health, The University of Adelaide<br>Roberts, Rachel; University of Adelaide, School of Psychology<br>Smithers, Lisa; University of Adelaide, Australia |
| Keywords:                     | Community child health < PAEDIATRICS, PUBLIC HEALTH, EPIDEMIOLOGY                                                                                                                                                                                                                                                                                                                                                                                                                                                                                                                                                                                                                                                                                                                                                                                                                                                                                                                                |
|                               |                                                                                                                                                                                                                                                                                                                                                                                                                                                                                                                                                                                                                                                                                                                                                                                                                                                                                                                                                                                                  |

SCHOLARONE™  
Manuscripts

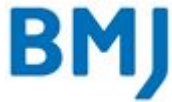

I, the Submitting Author has the right to grant and does grant on behalf of all authors of the Work (as defined in the below author licence), an exclusive licence and/or a non-exclusive licence for contributions from authors who are: i) UK Crown employees; ii) where BMJ has agreed a CC-BY licence shall apply, and/or iii) in accordance with the terms applicable for US Federal Government officers or employees acting as part of their official duties; on a worldwide, perpetual, irrevocable, royalty-free basis to BMJ Publishing Group Ltd ("BMJ") its licensees and where the relevant Journal is co-owned by BMJ to the co-owners of the Journal, to publish the Work in this journal and any other BMJ products and to exploit all rights, as set out in our [licence](#).

The Submitting Author accepts and understands that any supply made under these terms is made by BMJ to the Submitting Author unless you are acting as an employee on behalf of your employer or a postgraduate student of an affiliated institution which is paying any applicable article publishing charge ("APC") for Open Access articles. Where the Submitting Author wishes to make the Work available on an Open Access basis (and intends to pay the relevant APC), the terms of reuse of such Open Access shall be governed by a Creative Commons licence – details of these licences and which [Creative Commons](#) licence will apply to this Work are set out in our licence referred to above.

Other than as permitted in any relevant BMJ Author's Self Archiving Policies, I confirm this Work has not been accepted for publication elsewhere, is not being considered for publication elsewhere and does not duplicate material already published. I confirm all authors consent to publication of this Work and authorise the granting of this licence.

1  
2 Cohort Profile: South Australian Aboriginal Birth Cohort (SAABC); a prospective  
3  
4 birth cohort  
5  
6  
7

8 BMJ Open  
9

10  
11 Lisa Jamieson<sup>1,\*</sup>

12 Joanne Hedges<sup>1</sup>

13 Xiangqun Ju<sup>1</sup>

14 Kostas Kapellas<sup>1</sup>

15 Dandara Haag<sup>1</sup>

16 Pedro Ribeiro<sup>1</sup>

17 Davi Macedo<sup>1</sup>

18 Rachel Roberts<sup>2</sup>

19 Lisa Smithers<sup>3</sup>  
20  
21  
22  
23  
24  
25  
26  
27

28 1. Australian Research Centre for Population Oral Health

29 Adelaide Dental School

30 University of Adelaide

31 Adelaide

32 Australia  
33  
34  
35  
36  
37  
38

39 2. School of Psychology

40 University of Adelaide

41 Adelaide

42 Australia  
43  
44  
45  
46  
47

48 3. School of Public Health

49 University of Adelaide

50 Adelaide

51 Australia  
52  
53  
54  
55  
56  
57  
58  
59  
60

1  
2 ABSTRACT:  
3  
4

5 PURPOSE: The South Australian Aboriginal Birth Cohort (SAABC) is a prospective, longitudinal  
6 birth cohort established to: (1) provide estimates of Aboriginal child dental disease compared with  
7 general population estimates; (2) determine if an intervention aiming to reduce prevalence of early  
8 childhood caries was more effective in early versus late infancy; (3) examine if these differences  
9 were sustained over time and; (4) to document factors influencing social, behavioural, cognitive,  
10 anthropometric, dietary and educational attainment over time.  
11  
12  
13  
14  
15  
16

17 PARTICIPANTS: The original SAABC comprised 449 women pregnant with an Aboriginal child  
18 recruited Feb 2011 to May 2012. The sample represented two-thirds of those eligible, and was  
19 representative by age, socio-economic position and tobacco smoking status. At child age 2 years,  
20 324 participants were followed up (74% retention), at child age 3 years, 324 participants were  
21 followed up (74% retention) and at child age 5 years, 299 participants were followed up (69%  
22 retention). Fieldwork for follow-up at child age 7 years is underway (interrupted due to COVID-19  
23 restrictions), with funding available for follow-up at child age 9 years.  
24  
25  
26  
27  
28  
29  
30

31 FINDINGS TO DATE: At baseline, 53% of mothers were aged 14 to 24 years and 72% had  
32 achieved high school or less as their highest educational attainment. At child age 3 years, rates of  
33 dental disease were less among cohort children exposed to the intervention earlier rather  
34 than later in childhood. The effect appeared to be sustained at child age 5 years, rates were still  
35 higher than general child population estimates. Experiences of racism were high among mothers,  
36 with impacts on tooth brushing behaviours and experience of toothache. Compared with population  
37 estimates, levels of self-efficacy and self-rated oral health of mothers at baseline were low. The  
38 proportion of total energy from discretionary foods was far higher for study children at age 3 years  
39 than for non-Aboriginal Australian children. Breastfeeding >24 months was associated with higher  
40 dental caries prevalence at child age 3 years compared with children who were never breastfed.  
41  
42  
43  
44  
45  
46  
47  
48  
49

50 FUTURE PLANS: The current follow-up, and child age 9 year follow-up, will hopefully be  
51 completed without future interruption from COVID-19. We will seek funding for continued follow-  
52 up of the cohort at ages 11, 13 and 15 years. The data yielded will contribute to a greater  
53 understanding of the environmental, behavioural, dietary, biological and psychosocial factors  
54 contributing to Aboriginal child/adolescent oral health, general health and social and emotional  
55 wellbeing. This will be beneficial in charting the trajectory of cohort participants' health and  
56  
57  
58  
59  
60

1  
2 wellbeing overtime, particularly in identifying the antecedents of chronic diseases which are highly  
3 prevalent among Aboriginal Australian adults.  
4  
5  
6

7 REGISTRATION: Australian and New Zealand Clinical Trial Registry, ACTRN12611000111976.  
8  
9  
10  
11  
12  
13  
14  
15  
16  
17  
18  
19  
20  
21  
22  
23  
24  
25  
26  
27  
28  
29  
30  
31  
32  
33  
34  
35  
36  
37  
38  
39  
40  
41  
42  
43  
44  
45  
46  
47  
48  
49  
50  
51  
52  
53  
54  
55  
56  
57  
58  
59  
60

For peer review only

1  
2 INTRODUCTION: Untreated dental caries (tooth decay) in children may cause substantial pain and  
3 have severe consequences on eating, sleeping, playing, learning and general quality of life.<sup>1</sup> It is  
4 associated with other chronic childhood conditions such as malnutrition, and is the strongest  
5 predictor of poor oral health in adulthood.<sup>2</sup> Childhood caries is entirely preventable, yet Indigenous  
6 Australian children experience high levels of the disease, with Indigenous children in some areas  
7 having up to 5 times the prevalence of their non-Indigenous counterparts.<sup>3</sup> In the 2012-14 National  
8 Child Oral Health Survey, the mean number of decayed, missing or filled tooth surfaces in the  
9 primary dentition of Indigenous children aged 5 to 10 years was 6.3 compared with 2.9 among non-  
10 Indigenous children.<sup>4</sup>  
11  
12  
13  
14  
15  
16  
17  
18

19 Provision of dental care to young Indigenous children can pose many challenges because of child  
20 stage of emotional and physical development, and consequent capacity for co-operation in the  
21 dental chair. The issues are multiplied for Indigenous children in rural and remote locations, where  
22 access to dental care is severely limited. Hospital-based treatment under general anaesthetic is an  
23 increasingly utilised mode of dental treatment for such children, with Indigenous Australian  
24 children having twice the rate of hospital admissions for dental care than non-Indigenous children.<sup>5</sup>  
25 However, dental treatment under general anaesthetic does not prevent the occurrence of new dental  
26 decay, with children frequently re-admitted for hospital-based dental general anaesthetic after their  
27 initial treatment.<sup>6</sup> Oral rehabilitation under general anaesthetic also does little to alleviate dental fear  
28 or to change non-cooperative behaviour and may, in fact, heighten these characteristics. Moreover,  
29 comprehensive dental care under general anaesthetic is not without risk, including the potential for  
30 long-term adverse neuro-developmental effects.<sup>7-9</sup> Dental general anaesthetics are extremely  
31 expensive for the tax-payer and community more broadly, and require considerable time and  
32 financial investments from carers (to transport child to hospital, stay overnight, ensure fasting prior  
33 to operation etc). The estimated mean cost of dental general anaesthetics for Indigenous children is  
34 substantially higher than the cost of care for non-Indigenous children.<sup>7</sup> Preventive approaches that  
35 can be undertaken in the homes or Aboriginal Community Controlled Health Organisations of  
36 Indigenous children to reduce the number of children undergoing dental general anaesthetics is thus  
37 urgently required.  
38  
39  
40  
41  
42  
43  
44  
45  
46  
47  
48  
49  
50  
51  
52

53 The South Australian Aboriginal Birth Cohort study was established in 2011 to provide direct  
54 estimates of Aboriginal child dental disease in South Australia compared with general population  
55 estimates, to determine if an intervention aiming to reduce prevalence of early childhood caries was  
56 more effective in early versus late infancy, to examine if these differences were sustained over time,  
57 and to document social, behavioural, cognitive, anthropometric, dietary and educational attainment  
58  
59  
60

1  
2 over time. Funding was originally received in 2011 to establish the cohort and to follow-up at child  
3 ages 2 and 3 years.<sup>10</sup> Further funding was received to follow-up the children at age 5 years, with  
4 current funding received to follow-up the children at age 7 years (currently suspended due to  
5 COVID-19 restrictions) and 9 years.  
6  
7  
8  
9

## 10 COHORT DESCRIPTION

11 *Who is in the cohort?* This prospective birth cohort study was developed in partnership with local  
12 Aboriginal communities and endorsed by the study's Aboriginal Reference Group. Participants  
13 were 449 women pregnant with an Aboriginal child who were residing in South Australia during  
14 the recruitment period of February 2011 to May 2012. Recruitment was through the antenatal  
15 clinics of South Australian Aboriginal Community Controlled Health Organisations and hospitals.  
16 The sample represented two-thirds of those who were eligible during the recruitment period, and  
17 was representative by age, socio-economic position and tobacco smoking status.<sup>11</sup> One child passed  
18 away in utero and a further 12 passed away before their 2<sup>nd</sup> birthday. At child age 2 years, 324  
19 participants were followed up (74% retention; Figure 1). At child age 3 years, 324 participants were  
20 followed up (74% retention). At child age 5 years, 299 participants were followed up (69%  
21 retention). An early childhood caries intervention (that involved dental care to mothers, fluoride  
22 application to teeth of children and anticipatory guidance delivered via motivational interviewing)  
23 was implemented between pregnancy and child age 18 months (immediate intervention group) and  
24 between child age 2 years and 3 years (delayed intervention group).  
25  
26  
27  
28  
29  
30  
31  
32  
33  
34  
35  
36  
37

38 *How often have they been followed up?* Participants were recruited during pregnancy (baseline) and  
39 have been followed up at child mean ages 2 years, 3 years, 5 years and 7 years (currently suspended  
40 due to covid-19). Baseline and loss to follow-up sample characteristics are shown for pregnancy  
41 and child ages 2, 3 and 5 years in Table 1. At baseline, over half (53%) of mothers were aged 14 to  
42 24 years and 72% had achieved high school or less as their highest educational attainment. Around  
43 86% received their income from Centrelink (Government agency who provide welfare based on  
44 means testing) and 82% owned a health-care card (means-tested, allows access to some health  
45 services, for example, dental public health services that otherwise incur out-of-pocket expenses).  
46 Around 61% resided in non-metropolitan locations and almost two-thirds (64%) usually visit a  
47 dentist because of a problem. Three-quarters (75%) of mothers reported brushing their teeth the  
48 previous day and while 55% rated their oral health as fair or poor, only 10% rated their general  
49 health as fair or poor. A higher proportion of participants who were not followed-up at child ages  
50 two, three and five years had (at baseline) lower educational attainment, received their income from  
51 Centrelink, owned a healthcare card, resided in metropolitan locations, usually visited a dentist  
52  
53  
54  
55  
56  
57  
58  
59  
60



1  
2 because of a problem, did not brush their teeth the previous day, rated their oral health as fair or  
3 poor and rated their general health as fair or poor. All missing data for dental caries outcomes used  
4 in subsequent analyses was imputed (except outcomes for deceased children) under the assumption  
5 that data was missing at random using the Fully Conditional Specification method with logistic  
6 regression for binary variables and linear regression for continuous variables. We created 50  
7 imputed datasets using 50 iterations, with the results from the imputed datasets combined using  
8 Rubin's rules via the 'Proc mianalyse' function.  
9  
10  
11  
12  
13  
14

15  
16 *What has been measured?* Broad categories of variables collected at baseline and each follow-up  
17 phase are provided in Table 2, with more detail of these variables provided in Table 3. Data linkage  
18 to government repositories has been approved and is currently underway, with participant consent.  
19 Details of the government linkage datasets is provided in Table 4. Self-report questionnaires were  
20 completed with the assistance of trained research officers if required. Dental examinations were  
21 standardised and conducted by three calibrated dental professionals. Procedures appropriate for  
22 young children were used when children were aged 2 years and 3 years, for example, in the 'knee-  
23 to-knee' position on their carer's lap. Before examinations, teeth were dried with cotton pads.  
24 Standard infection control procedures were followed and a fibre-optic light used as a light source.  
25 Diagnosis was based on visual criteria only. Any child diagnosed with carious lesions was referred  
26 for dental care through the South Australian Dental Service (provided free of charge). Weight was  
27 measured in duplicate to the nearest 0.1 kg using Seca model 803 scales and averaged. If measures  
28 differed by >0.2 kg, a third measure was taken and the average of the two closest values used in  
29 analyses. Height was measured in duplicate to the nearest 1 mm using a Seca model 213 portable  
30 stadiometer, using a standard anthropometric procedure. If measures differed by >5 mm a third  
31 measurement was taken and the average of the closest two used in analyses. Blood pressure was  
32 measured using a portable oscillometric device (Omron HEM-7211) and a cuff selected to suit the  
33 child's mid-upper arm circumference using a standard protocol.  
34  
35  
36  
37  
38  
39  
40  
41  
42  
43  
44  
45  
46  
47

48  
49 **FINDINGS TO DATE:** Rates of dental disease among Aboriginal children in South Australia were  
50 less among those exposed to the intervention earlier rather than later in childhood.<sup>12,13</sup> The effect  
51 appeared to be sustained at child age 5 years, although the rates of dental disease were still far  
52 higher than estimates reported in Australia's National Child Oral Health Survey 2012-14.<sup>14</sup> Rates of  
53 psychosocial stress among mothers pregnant with Aboriginal children were high compared with  
54 general Australian population estimates.<sup>15</sup> Experiences of racism were high among mothers, with  
55 impacts on tooth brushing behaviours<sup>16</sup> and experience of toothache.<sup>17</sup> Compared with population  
56 estimates, levels of self-efficacy and self-rated oral health of study participants at baseline were  
57  
58  
59  
60

1  
2 low,<sup>18</sup> with differences in the frame of reference regarding participants' self-rated oral health and  
3 self-rated general health described.<sup>19</sup> Smithers and colleagues reported that the proportion of total  
4 energy from discretionary foods (including sugars in discretionary foods) was far higher for study  
5 children at age 3 years than for non-Aboriginal Australian children.<sup>20</sup> Haag and others described  
6 how breastfeeding >24 months was associated with higher dental caries prevalence at child age 3  
7 years compared with children who were never breastfed.<sup>21</sup> Santiago and colleagues demonstrated  
8 how social support was characterised among study participants,<sup>22</sup> and the impact of personal control  
9 on self-reported health outcomes.<sup>23</sup> The effectiveness of implementing a motivational interviewing  
10 approach to preventing poor oral health among Indigenous children and their families was  
11 discussed,<sup>24</sup> with comparisons made with other studies involving motivational interviewing and the  
12 oral health of vulnerable children.<sup>25</sup>

21  
22  
23 **STRENGTHS AND LIMITATIONS:** The main strength of the study is the Aboriginal community  
24 engagement, involvement and partnership, orchestrated through the study's Aboriginal Reference  
25 Group, through the Aboriginal Community Controlled Health Organisation stakeholder groups and  
26 by the Senior Aboriginal research officer (JH). This has, without doubt, contributed to the excellent  
27 follow-up rates, which need to be taken into context. For example, this cohort study has been  
28 undertaken over vast distances (e.g. travelling 700 km to the west of South Australia, 400 km east,  
29 800 km north), involving highly disadvantaged participants who have not always enjoyed positive  
30 research interactions. The fact that participants represented two-thirds of those eligible to be  
31 recruited during the recruitment period demonstrates the widespread community support and  
32 generalisability of the results. The main limitation is the small sample size, which was essentially  
33 limited by the small population size of Aboriginal people in South Australia (around 2% of the total  
34 population). That we were able to recruit two thirds of those who were eligible at baseline (and have  
35 had strong retention of participants since) suggests that had the target population size been larger at  
36 baseline, the sample size of our study would consequently also be larger. Participants reported that  
37 the dietary recalls (collected at child age 2 years) were burdensome and this may have increased  
38 non-response or socially desirable responses. At the time of writing, follow-up at child age 7 years  
39 was suspended due to social distancing restrictions necessitated by the COVID-19 pandemic. This  
40 may impact our child age 9 years follow-up also.

54  
55 **COLLABORATION:** Study data are not freely available because of ethical and data protection  
56 constraints. The de-identified data are stored at the University of Adelaide and cannot be sent  
57 outside the institution. Proposals for possible collaborations in further analyses of the data should be  
58 addressed to Lisa Jamieson (lisa.jamieson@adelaide.edu.au)

1  
2 and will be reviewed by the SAABC research team and Aboriginal Reference Group.  
3  
4

5 FUNDING: This study was funded by the National Health and Medical Research Council of  
6 Australia (NHMRC, Project Grants 627350 and 1153662) and a Channel 7 Children's Research  
7 Foundation grant (10547012). LMJ is supported by a NHMRC Senior Research Fellowship.  
8  
9  
10

11 ACKNOWLEDGEMENTS: The authors gratefully acknowledge the support of the South  
12 Australian Aboriginal Birth Cohort study participants, study staff and partners: South Australian  
13 Dental Service, Colgate Palmolive, Women's and Children's Hospital, Lyell McEwen Hospital,  
14 Flinders' Medical Centre, Aboriginal Family Support Services, Aboriginal Primary Health Unit,  
15 Metro Aboriginal Family Birthing Program, Kura Yerlo Centre, Aboriginal Legal Rights  
16 Movement, Wodlitanattoai Program, Ninko Kutangga Patpangga, Kanggawodli Step Down Service,  
17 Kaurna Plains, Fleurieu Families, Gilles Plains Community Health, MADEC Community Support  
18 Services, Naporendi Aboriginal Forum, Nunga MiMinar, Aboriginal Strategy Unit of Families  
19 South Australia, Inbarendi College, Para West Adult Campus, Pangula Mannanurna Aboriginal  
20 Health Corporation and the Muno Parra Medical Centre, Second Story, Inner Southern Health  
21 Service, The Corner House, Louise Place, PARKS, Talking Realities Program, Child Youth  
22 Women's Health Services, Southern Junction Community Services, TAFE campuses, GP Plus  
23 centres, employment programs, childcare centres, women's centres, domestic violence shelters, and  
24 primary and high schools.  
25  
26  
27  
28  
29  
30  
31  
32  
33  
34  
35  
36  
37  
38  
39  
40  
41  
42  
43  
44  
45  
46  
47  
48  
49  
50  
51  
52  
53  
54  
55  
56  
57  
58  
59  
60

## References

1. Peres MA, Macpherson LMD, Weyant RJ, Daly B, Venturelli R, Mathur MR, Listl S, Celeste RK, Guarnizo-Herreño CC, Kearns C, Benzian H, Allison P, Watt RG. Oral diseases: a global public health challenge. *Lancet*. 2019;394:249-260.
2. Isaksson H, Alm A, Koch G, Birkhed D, Wendt LK. Caries prevalence in Swedish 20-year-olds in relation to their previous caries experience. *Caries Res*. 2013;47:234-242.
3. Jamieson LM, Armfield JM, Roberts-Thomson KF. Oral health inequalities among indigenous and nonindigenous children in the Northern Territory of Australia. *Community Dent Oral Epidemiol*. 2006;34:267-276.
4. Do LG, Spencer AJ. *Oral health of Australian children: the National Child Oral Health Study 2012–14*. Adelaide: University of Adelaide Press, 2016.
5. Australian Institute of Health and Welfare. *Oral health and dental care in Australia: key facts and figures trends 2014*. Canberra: AIHW; 2014.
6. Tahmassebi JF, Achol LT, Fayle SA. Analysis of dental care of children receiving comprehensive care under general anaesthesia at a teaching hospital in England. *Eur Arch Paediatr Dent* 2014;15:353–360.
7. Alsharif AT, Kruger E, Tennant M. A population-based cost description study of oral treatment of hospitalized Western Australian children aged younger than 15 years. *J Public Health Dent* 2015;75:202–209.
8. Lee HH, Milgrom P, Starks H, Burke W. Trends in death associated with pediatric dental sedation and general anesthesia. *Paediatr Anaesth* 2013;23:741-746.
9. Ing C, DiMaggio C, Whitehouse A, Hegarty MK, Brady J, von Ungern-Sternberg BS, Davidson A, Wood AJ, Li G, Sun LS. Long-term differences in language and cognitive function after childhood exposure to anesthesia. *Pediatrics* 2012;130:e476-e485.
10. Merrick J, Chong A, Parker E, Roberts-Thomson K, Misan G, Spencer J, Broughton J, Lawrence H, Jamieson L. Reducing disease burden and health inequalities arising from chronic

- 1  
2 disease among Indigenous children: an early childhood caries intervention. *BMC Public*  
3 *Health*. 2012;**12**:323.  
4  
5  
6  
7 11. Government of South Australia. *Pregnancy Outcome in South Australia 2011*. Adelaide:  
8 Government of South Australia; 2013.  
9  
10  
11  
12 12. Jamieson L, Smithers L, Hedges J, Parker E, Mills H, Kapellas K, Lawrence HP, Broughton JR,  
13 Ju X. Dental Disease Outcomes Following a 2-Year Oral Health Promotion Program for Australian  
14 Aboriginal Children and Their Families: A 2-Arm Parallel, Single-blind, Randomised Controlled  
15 Trial. *EClinicalMedicine*. 2018;**1**:43-50.  
16  
17  
18  
19  
20  
21 13. Jamieson LM, Smithers LG, Hedges J, Aldis J, Mills H, Kapellas K, Lawrence HP, Broughton  
22 JR, Ju X. Follow-up of an Intervention to Reduce Dental Caries in Indigenous Australian Children:  
23 A Secondary Analysis of a Randomized Clinical Trial. *JAMA Netw Open*. 2019;**2**:e190648.  
24  
25  
26  
27  
28 14. Jamieson L, Smithers L, Hedges J, Mills H, Kapellas K, Ha D, Do L, Ju X. Follow-up of  
29 Intervention to Prevent Dental Caries Among Indigenous Children in Australia: A Secondary  
30 Analysis of a Randomized Clinical Trial. *JAMA Netw Open*. 2019;**2**:e1915611.  
31  
32  
33  
34  
35 15. Santiago PHR, Roberts R, Smithers LG, Jamieson L. Stress beyond coping? A Rasch analysis  
36 of the Perceived Stress Scale (PSS-14) in an Aboriginal population. *PLoS One*. 2019;**14**:e0216333.  
37  
38  
39  
40 16. Ben J, Jamieson LM, Priest N, Parker EJ, Roberts-Thomson KF, Lawrence HP, Broughton J,  
41 Paradies Y. Experience of racism and tooth brushing among pregnant Aboriginal Australians:  
42 exploring psychosocial mediators. *Community Dent Health*. 2014b;**31**:145-52.  
43  
44  
45  
46  
47 17. Ben J, Paradies Y, Priest N, Parker EJ, Roberts-Thomson KF, Lawrence HP, Broughton J,  
48 Jamieson LM. Self-reported racism and experience of toothache among pregnant Aboriginal  
49 Australians: the role of perceived stress, sense of control, and social support. *J Public Health Dent*.  
50 2014b;**74**:301-9.  
51  
52  
53  
54  
55 18. Jamieson LM, Parker EJ, Roberts-Thomson KF, Lawrence HP, Broughton J. Self-efficacy and  
56 self-rated oral health among pregnant aboriginal Australian women. *BMC Oral Health*.  
57 2014;**14**:29.  
58  
59  
60

- 1  
2 19. Chand R, Parker E, Jamieson L. Differences in, and Frames of Reference of, Indigenous  
3  
4 Australians' Self-rated General and Oral Health. *J Health Care Poor Underserved*. 2017;**28**:1087-  
5  
6 1103.  
7  
8  
9 20. Smithers LG, Lynch J, Hedges J, Jamieson LM. Diet and anthropometry at 2 years of age  
10 following an oral health promotion programme for Australian Aboriginal children and their carers:  
11 a randomised controlled trial. *Br J Nutr*. 2017;**118**:1061-1069.  
12  
13  
14  
15 21. Haag DG, Jamieson LM, Hedges J, Smithers LG. Is There an Association between  
16 Breastfeeding and Dental Caries among Three-Year-Old Australian Aboriginal Children? *Nutrients*.  
17 2019;11.  
18  
19  
20  
21  
22 22. Santiago PHR, Roberts R, Smithers LG, Jamieson L. Networks of support: psychometric  
23 properties of the Social Support Scale (SSS) in two Aboriginal samples. *Australian and New*  
24 *Zealand Journal of Psychiatry*. In Press.  
25  
26  
27  
28  
29 23. Santiago PHR, Nielsen T, Roberts R, Smithers LG, Jamieson L. Sense of Personal Control: can  
30 it be assessed fairly across Aboriginal and non-Aboriginal Australians? *PloS One*. In Press.  
31  
32  
33  
34 24. Jamieson L, Bradshaw J, Lawrence H, Broughton J, Venner K. Fidelity of Motivational  
35 Interviewing in an Early Childhood Caries Intervention Involving Indigenous Australian Mothers. *J*  
36 *Health Care Poor Underserved*. 2016;**27**:125-138.  
37  
38  
39  
40  
41 25. Jamieson LM, Garcia RI, Sohn W, Albino J. Challenges and Solutions for Improved Oral  
42 Health: Examples from Motivational Interviewing Trials. *JDR Clin Trans Res*. 2020;**5**:107-108.  
43  
44  
45  
46  
47  
48  
49  
50  
51  
52  
53  
54  
55  
56  
57  
58  
59  
60

Table 1. Baseline and follow-up/loss to follow-up characteristics at child age 2 years, 3 years and 5 years

|                                   | Baseline<br>(pregnancy)<br>(n=448) | Child age 2<br>years follow-up<br>(n=324) | Child age 2 years<br>loss to follow-up<br>(n=112) | Child age 3<br>years follow-up<br>(n=324) | Child age 3 years<br>loss to follow-up<br>(n=112) | Child age 5<br>years follow-up<br>(n=299) | Child age 5 years<br>loss to follow-up<br>(n=137) |
|-----------------------------------|------------------------------------|-------------------------------------------|---------------------------------------------------|-------------------------------------------|---------------------------------------------------|-------------------------------------------|---------------------------------------------------|
| <b>Maternal age</b>               |                                    |                                           |                                                   |                                           |                                                   |                                           |                                                   |
| 14-24                             | 238 (53.1)                         | 172 (53.1)                                | 66 (53.2)                                         | 173 (53.2)                                | 59 (52.7)                                         | 156 (52.2)                                | 76 (55.5)                                         |
| 25+                               | 210 (46.9)                         | 152 (46.9)                                | 58 (46.8)                                         | 152 (46.8)                                | 53 (47.3)                                         | 143 (47.8)                                | 61 (44.5)                                         |
| <b>Education</b>                  |                                    |                                           |                                                   |                                           |                                                   |                                           |                                                   |
| High school or less               | 322 (72.4)                         | 226 (70.0)                                | 88 (79.3)                                         | 232 (72.1)                                | 82 (73.2)                                         | 203 (68.4)                                | 111 (81.0)                                        |
| Trade or University               | 123 (27.6)                         | 97 (30.0)                                 | 23 (20.7)                                         | 90 (28.0)                                 | 30 (26.8)                                         | 94 (31.7)                                 | 26 (19.0)                                         |
| <b>Income</b>                     |                                    |                                           |                                                   |                                           |                                                   |                                           |                                                   |
| Job                               | 62 (14.0)                          | 56 (17.34)                                | 4 (3.7)                                           | 55 (17.1)                                 | 5 (4.5)                                           | 47 (15.9)                                 | 13 (9.6)                                          |
| Centrelink                        | 381 (86.0)                         | 267 (82.7)                                | 105 (96.3)                                        | 267 (82.9)                                | 106 (95.5)                                        | 249 (84.1)                                | 123 (90.4)                                        |
| <b>HCC status</b>                 |                                    |                                           |                                                   |                                           |                                                   |                                           |                                                   |
| Yes                               | 358 (82.2)                         | 254 (79.9)                                | 95 (89.6)                                         | 252 (79.3)                                | 97 (91.5)                                         | 236 (80.8)                                | 113 (85.6)                                        |
| No                                | 77 (17.8)                          | 64 (20.1)                                 | 11 (10.4)                                         | 66 (20.8)                                 | 9 (8.5)                                           | 56 (19.2)                                 | 19 (14.4)                                         |
| <b>Residential location</b>       |                                    |                                           |                                                   |                                           |                                                   |                                           |                                                   |
| Metropolitan                      | 171 (38.7)                         | 116 (36.3)                                | 55 (45.1)                                         | 116 (36.1)                                | 51 (46.0)                                         | 132 (44.8)                                | 35 (25.7)                                         |
| Non- metropolitan                 | 271 (61.3)                         | 204 (63.8)                                | 67 (54.9)                                         | 205 (63.9)                                | 60 (54.1)                                         | 163 (55.2)                                | 101 (74.3)                                        |
| <b>Usual reason visit dentist</b> |                                    |                                           |                                                   |                                           |                                                   |                                           |                                                   |
| Problem                           | 275 (64.0)                         | 195 (61.9)                                | 72 (69.2)                                         | 194 (62.4)                                | 74 (67.9)                                         | 184 (63.7)                                | 83 (63.8)                                         |
| Check-up                          | 155 (36.1)                         | 120 (38.1)                                | 32 (30.8)                                         | 117 (37.6)                                | 35 (32.1)                                         | 105 (36.3)                                | 47 (36.2)                                         |
| <b>Brush yesterday</b>            |                                    |                                           |                                                   |                                           |                                                   |                                           |                                                   |
| Yes                               | 321 (75.0)                         | 239 (76.0)                                | 74 (69.8)                                         | 240 (77.4)                                | 74 (67.9)                                         | 217 (75.9)                                | 96 (72.7)                                         |
| No                                | 107 (25.0)                         | 73 (23.4)                                 | 32 (30.2)                                         | 70 (22.6)                                 | 35 (32.1)                                         | 69 (24.1)                                 | 36 (27.3)                                         |
| <b>Self-rated oral health</b>     |                                    |                                           |                                                   |                                           |                                                   |                                           |                                                   |
| Excellent, very good or good      | 203 (45.3)                         | 153 (47.2)                                | 43 (38.4)                                         | 151 (46.5)                                | 46 (41.1)                                         | 130 (43.5)                                | 66 (48.2)                                         |
| Fair or poor                      | 245 (54.7)                         | 171 (52.8)                                | 69 (61.6)                                         | 174 (53.5)                                | 66 (58.9)                                         | 169 (56.5)                                | 71 (51.8)                                         |
| <b>Self-rated general health</b>  |                                    |                                           |                                                   |                                           |                                                   |                                           |                                                   |
| Excellent, very good or good      | 402 (89.9)                         | 294 (91.0)                                | 97 (86.6)                                         | 298 (92.0)                                | 94 (83.9)                                         | 272 (91.0)                                | 119 (87.5)                                        |
| Fair or poor                      | 45 (10.1)                          | 29 (9.0)                                  | 15 (13.4)                                         | 26 (8.0)                                  | 18 (16.1)                                         | 27 (9.0)                                  | 17 (12.5)                                         |

Table 2. Broad categories of variables collected at baseline and each follow-up phase

| Phase                  | Measurements                                                                                                                                                                                                                                                                                                                                                                                                                                                                                                                                                                                                                                                                                                                                                  |
|------------------------|---------------------------------------------------------------------------------------------------------------------------------------------------------------------------------------------------------------------------------------------------------------------------------------------------------------------------------------------------------------------------------------------------------------------------------------------------------------------------------------------------------------------------------------------------------------------------------------------------------------------------------------------------------------------------------------------------------------------------------------------------------------|
| Baseline               | Mother self-reported questionnaire <ul style="list-style-type: none"> <li>• Dental treatment needs, oral health-related behaviours, maternal oral self-efficacy, self-rated oral health and oral health related quality of life.</li> <li>• General health conditions, health-related behaviours and self-rated general health.</li> <li>• Socioeconomic and psychosocial factors, including income, education, employment, experience of racism and cultural identity.</li> </ul>                                                                                                                                                                                                                                                                            |
| Child mean age 2 years | Carer self-reported questionnaire <ul style="list-style-type: none"> <li>• Dental treatment needs, oral health-related behaviours, maternal oral health literacy, self-efficacy, dental perceptions, self-rated oral health and oral health related quality of life.</li> <li>• General health conditions (mother and child), health-related behaviours, physical activity, self-rated general health, 24-hour dietary recalls (child), breastfeeding habits.</li> <li>• Socioeconomic and psychosocial factors, including income, education, employment, experience of racism and cultural identity.</li> <li>• Family functioning and home environment</li> </ul> Child height, weight, blood pressure, upper arm circumference<br>Child dental examination |
| Child mean age 3 years | Carer self-reported questionnaire <ul style="list-style-type: none"> <li>• Dental treatment needs, oral health-related behaviours, maternal oral health literacy, self-efficacy, dental perceptions, self-rated oral health and oral health related quality of life.</li> <li>• General health conditions (mother and child), health-related behaviours, physical activity, self-rated general health and dietary habits</li> <li>• Socioeconomic factors.</li> </ul> Child height, weight, blood pressure, upper arm circumference<br>Child dental examination                                                                                                                                                                                               |
| Child mean age 5 years | Carer self-reported questionnaire <ul style="list-style-type: none"> <li>• Dental treatment needs, oral health-related behaviours, maternal oral health literacy, self-efficacy, dental perceptions, self-rated oral health and oral health related quality of life.</li> <li>• General health conditions (mother and child), health-related behaviours, physical activity, self-rated general health and dietary habits.</li> <li>• Socioeconomic factors.</li> <li>• Family functioning and home environment.</li> <li>• Child socioemotional well-being and cognitive outcomes.</li> </ul> Child height, weight, blood pressure, upper arm circumference<br>Child dental examination                                                                       |



|                               |                                                                                                                                                                                                                                                                                                                                                                                                                                                                                                                                                                                                                                                                                                        |
|-------------------------------|--------------------------------------------------------------------------------------------------------------------------------------------------------------------------------------------------------------------------------------------------------------------------------------------------------------------------------------------------------------------------------------------------------------------------------------------------------------------------------------------------------------------------------------------------------------------------------------------------------------------------------------------------------------------------------------------------------|
| <p>Child mean age 7 years</p> | <p>Carer self-reported questionnaire</p> <ul style="list-style-type: none"> <li>• Dental treatment needs, oral health-related behaviours, maternal oral health literacy, self-efficacy, dental perceptions, self-rated oral health and oral health related quality of life.</li> <li>• General health conditions (mother and child), health-related behaviours, physical activity, self-rated general health and dietary habits.</li> <li>• Socioeconomic factors.</li> <li>• Family functioning and home environment.</li> <li>• Child socioemotional well-being and cognitive outcomes.</li> </ul> <p>Child height, weight, blood pressure, upper arm circumference<br/>Child dental examination</p> |
|-------------------------------|--------------------------------------------------------------------------------------------------------------------------------------------------------------------------------------------------------------------------------------------------------------------------------------------------------------------------------------------------------------------------------------------------------------------------------------------------------------------------------------------------------------------------------------------------------------------------------------------------------------------------------------------------------------------------------------------------------|

Table 3. Detail of variables collected at baseline and each follow-up phase

|                                                                                        | Baseline<br>(Pregnancy<br>n=449) | 2 years<br>(n=324) | 3 years<br>(n=324) | 5 years<br>(n=299) | 7 years<br>(ongoing) |
|----------------------------------------------------------------------------------------|----------------------------------|--------------------|--------------------|--------------------|----------------------|
| <b>Oral health-related variables</b>                                                   |                                  |                    |                    |                    |                      |
| Dental examinations (child- dental caries, gingivitis, trauma)                         |                                  | ✓                  | ✓                  | ✓                  | ✓                    |
| Dental treatment needs (mother and child)                                              | ✓                                | ✓                  | ✓                  | ✓                  | ✓                    |
| Oral health-related behaviours (oral hygiene habits)                                   | ✓                                | ✓                  | ✓                  | ✓                  | ✓                    |
| Oral health self-efficacy (mother)                                                     | ✓                                | ✓                  | ✓                  | ✓                  |                      |
| Oral health literacy (mother)                                                          |                                  | ✓                  | ✓                  | ✓                  |                      |
| Knowledge of children's oral health (mother)                                           | ✓                                | ✓                  | ✓                  | ✓                  |                      |
| Oral health fatalism (mother and child)                                                | ✓                                | ✓                  | ✓                  | ✓                  |                      |
| Dental perceptions                                                                     |                                  |                    | ✓                  |                    |                      |
| Oral health-related quality of life (mother and child)                                 | ✓                                | ✓                  | ✓                  | ✓                  | ✓                    |
| <b>General health</b>                                                                  |                                  |                    |                    |                    |                      |
| Anthropometric measurements (height weight, arm circumference, blood pressure) (child) |                                  | ✓                  | ✓                  | ✓                  | ✓                    |
| General health conditions and hospitalisations (child)                                 | ✓                                | ✓                  | ✓                  | ✓                  | ✓                    |
| Health-related behaviours (smoking, alcohol intake) (mother)                           | ✓                                | ✓                  | ✓                  | ✓                  | ✓                    |
| Physical activity (child)                                                              |                                  |                    | ✓                  | ✓                  |                      |
| Self-rated general and oral health (mother and child)                                  | ✓                                | ✓                  | ✓                  | ✓                  | ✓                    |
| 24-hour dietary recalls (child)                                                        |                                  | ✓                  |                    |                    |                      |
| Breastfeeding habits (child)                                                           |                                  | ✓                  |                    |                    |                      |
| Other dietary-related habits (mother and child)                                        | ✓                                | ✓                  | ✓                  | ✓                  | ✓                    |
| <b>Socioeconomic and psychosocial factors</b>                                          |                                  |                    |                    |                    |                      |
| Income, education, socioeconomic hardship, employment (mother)                         | ✓                                | ✓                  | ✓                  | ✓                  | ✓                    |
| Experience of Racism (mother)                                                          | ✓                                | ✓                  |                    |                    | ✓                    |

|    |                                         |   |   |   |   |
|----|-----------------------------------------|---|---|---|---|
| 1  |                                         |   |   |   |   |
| 2  | Cultural identity (mother)              | ✓ | ✓ |   |   |
| 3  |                                         |   |   |   |   |
| 4  | Self-stem (child)                       |   |   |   | ✓ |
| 5  |                                         |   |   |   |   |
| 6  |                                         |   |   |   |   |
| 7  | Social support and sense of self-       | ✓ |   |   |   |
| 8  | control (mother)                        |   |   |   |   |
| 9  |                                         |   |   |   |   |
| 10 | Family functioning and home environment |   |   |   |   |
| 11 | Parental functioning and home           |   | ✓ | ✓ | ✓ |
| 12 | environment (mother and child)          |   |   |   |   |
| 13 |                                         |   |   |   |   |
| 14 | Time-use diaries (child)                |   |   |   | ✓ |
| 15 |                                         |   |   |   |   |
| 16 |                                         |   |   |   |   |
| 17 | Child development                       |   |   |   |   |
| 18 | Cognitive outcomes (child)              |   |   | ✓ | ✓ |
| 19 |                                         |   |   |   |   |
| 20 |                                         |   |   |   |   |
| 21 | Social and emotional well-being         |   |   | ✓ | ✓ |
| 22 | (child)                                 |   |   |   |   |
| 23 |                                         |   |   |   |   |
| 24 |                                         |   |   |   |   |
| 25 |                                         |   |   |   |   |
| 26 |                                         |   |   |   |   |
| 27 |                                         |   |   |   |   |
| 28 |                                         |   |   |   |   |
| 29 |                                         |   |   |   |   |
| 30 |                                         |   |   |   |   |
| 31 |                                         |   |   |   |   |
| 32 |                                         |   |   |   |   |
| 33 |                                         |   |   |   |   |
| 34 |                                         |   |   |   |   |
| 35 |                                         |   |   |   |   |
| 36 |                                         |   |   |   |   |
| 37 |                                         |   |   |   |   |
| 38 |                                         |   |   |   |   |
| 39 |                                         |   |   |   |   |
| 40 |                                         |   |   |   |   |
| 41 |                                         |   |   |   |   |
| 42 |                                         |   |   |   |   |
| 43 |                                         |   |   |   |   |
| 44 |                                         |   |   |   |   |
| 45 |                                         |   |   |   |   |
| 46 |                                         |   |   |   |   |
| 47 |                                         |   |   |   |   |
| 48 |                                         |   |   |   |   |
| 49 |                                         |   |   |   |   |
| 50 |                                         |   |   |   |   |
| 51 |                                         |   |   |   |   |
| 52 |                                         |   |   |   |   |
| 53 |                                         |   |   |   |   |
| 54 |                                         |   |   |   |   |
| 55 |                                         |   |   |   |   |
| 56 |                                         |   |   |   |   |
| 57 |                                         |   |   |   |   |
| 58 |                                         |   |   |   |   |
| 59 |                                         |   |   |   |   |
| 60 |                                         |   |   |   |   |

Table 4. Datasets to be included in data linkage

| Database domain                                 | Types of information                                                                                                                                |
|-------------------------------------------------|-----------------------------------------------------------------------------------------------------------------------------------------------------|
| Hospital admissions                             | Length of stay, ICD codes describing each hospitalisation event                                                                                     |
| Presentations at hospital emergency departments | Presenting problem, diagnosis                                                                                                                       |
| Well-child health checks                        | Child growth and development collected by nurses at routine health checks and ad hoc visits to local health clinics                                 |
| Perinatal information                           | Medical information about pregnancy and child's birth                                                                                               |
| Public dental care                              | Dental treatments received by child in public dental clinics                                                                                        |
| School Enrolment                                | Information provided by carers at the time the child was enrolled at school including carer education, languages spoken at home and school absences |
| Literacy and Numeracy                           | Results on reading, writing and numeracy collected from a national assessment program when child is in year 3 (approximate age 8) at school         |
| Housing                                         | Information about families living in homes provided by the government                                                                               |

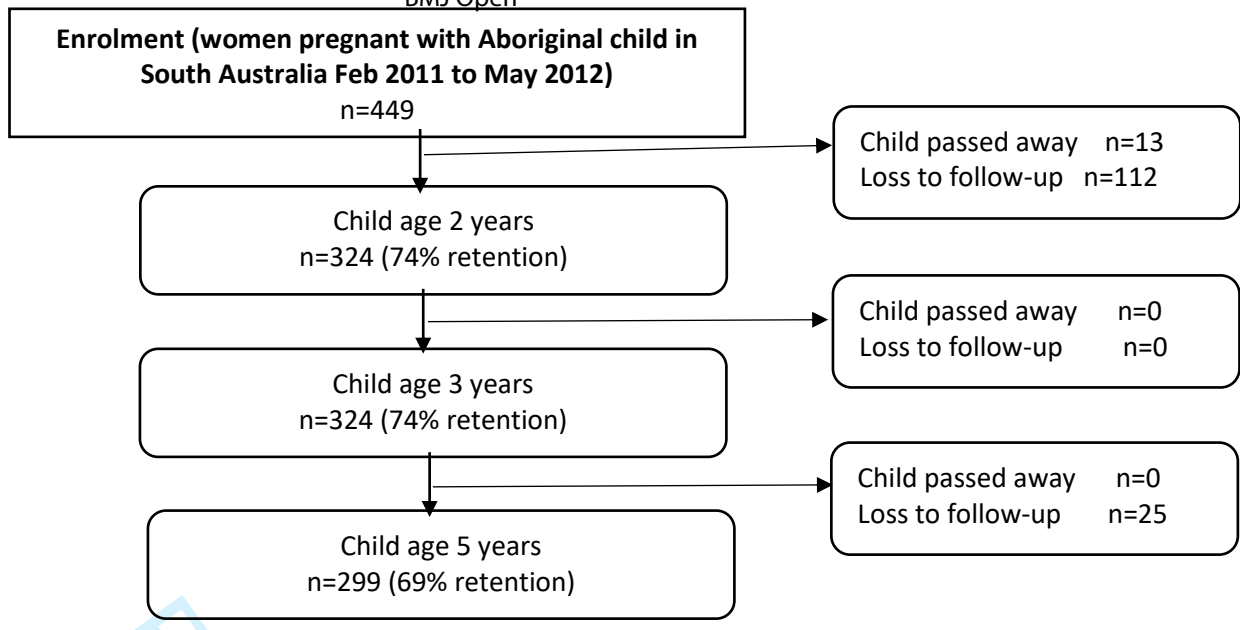

Fig 1: Flow diagram of participants through key stages of the cohort study

For peer review only

# BMJ Open

## Cohort Profile: South Australian Aboriginal Birth Cohort (SAABC); a prospective longitudinal birth cohort

|                                 |                                                                                                                                                                                                                                                                                                                                                                                                                                                                                                                                                                                                                                                                                                                                                                                                                                                                                                                                                                                                                                                                                      |
|---------------------------------|--------------------------------------------------------------------------------------------------------------------------------------------------------------------------------------------------------------------------------------------------------------------------------------------------------------------------------------------------------------------------------------------------------------------------------------------------------------------------------------------------------------------------------------------------------------------------------------------------------------------------------------------------------------------------------------------------------------------------------------------------------------------------------------------------------------------------------------------------------------------------------------------------------------------------------------------------------------------------------------------------------------------------------------------------------------------------------------|
| Journal:                        | <i>BMJ Open</i>                                                                                                                                                                                                                                                                                                                                                                                                                                                                                                                                                                                                                                                                                                                                                                                                                                                                                                                                                                                                                                                                      |
| Manuscript ID                   | bmjopen-2020-043559.R1                                                                                                                                                                                                                                                                                                                                                                                                                                                                                                                                                                                                                                                                                                                                                                                                                                                                                                                                                                                                                                                               |
| Article Type:                   | Cohort profile                                                                                                                                                                                                                                                                                                                                                                                                                                                                                                                                                                                                                                                                                                                                                                                                                                                                                                                                                                                                                                                                       |
| Date Submitted by the Author:   | 16-Nov-2020                                                                                                                                                                                                                                                                                                                                                                                                                                                                                                                                                                                                                                                                                                                                                                                                                                                                                                                                                                                                                                                                          |
| Complete List of Authors:       | Jamieson, Lisa M.; The University of Adelaide, Australian Research Centre for Population Oral Health<br>Hedges, Joanne; Australian Research Centre for Population Oral Health, The University of Adelaide<br>Ju, X; Australian Research Centre for Population Oral Health, The University of Adelaide<br>Kapellas, Kostas; Australian Research Centre for Population Oral Health, The University of Adelaide,<br>Leane, Cathy; Women's and Children's Health Network, South Australian Government<br>Haag, Dandara; The University of Adelaide, Australian Research Centre for Population Oral Health (ARCPOH), Adelaide Dental School; The University of Adelaide, Better Start Child Health and Development Research Group, School of Public Health<br>Santiago, Pedro; Australian Research Centre for Population Oral Health, The University of Adelaide<br>Macedo, Davi; Australian Research Centre for Population Oral Health, The University of Adelaide<br>Roberts, Rachel; University of Adelaide, School of Psychology<br>Smithers, Lisa; University of Adelaide, Australia |
| <b>Primary Subject Heading</b>: | Epidemiology                                                                                                                                                                                                                                                                                                                                                                                                                                                                                                                                                                                                                                                                                                                                                                                                                                                                                                                                                                                                                                                                         |
| Secondary Subject Heading:      | Dentistry and oral medicine, Epidemiology, Paediatrics                                                                                                                                                                                                                                                                                                                                                                                                                                                                                                                                                                                                                                                                                                                                                                                                                                                                                                                                                                                                                               |
| Keywords:                       | Community child health < PAEDIATRICS, PUBLIC HEALTH, EPIDEMIOLOGY                                                                                                                                                                                                                                                                                                                                                                                                                                                                                                                                                                                                                                                                                                                                                                                                                                                                                                                                                                                                                    |
|                                 |                                                                                                                                                                                                                                                                                                                                                                                                                                                                                                                                                                                                                                                                                                                                                                                                                                                                                                                                                                                                                                                                                      |

SCHOLARONE™  
Manuscripts



I, the Submitting Author has the right to grant and does grant on behalf of all authors of the Work (as defined in the below author licence), an exclusive licence and/or a non-exclusive licence for contributions from authors who are: i) UK Crown employees; ii) where BMJ has agreed a CC-BY licence shall apply, and/or iii) in accordance with the terms applicable for US Federal Government officers or employees acting as part of their official duties; on a worldwide, perpetual, irrevocable, royalty-free basis to BMJ Publishing Group Ltd ("BMJ") its licensees and where the relevant Journal is co-owned by BMJ to the co-owners of the Journal, to publish the Work in this journal and any other BMJ products and to exploit all rights, as set out in our [licence](#).

The Submitting Author accepts and understands that any supply made under these terms is made by BMJ to the Submitting Author unless you are acting as an employee on behalf of your employer or a postgraduate student of an affiliated institution which is paying any applicable article publishing charge ("APC") for Open Access articles. Where the Submitting Author wishes to make the Work available on an Open Access basis (and intends to pay the relevant APC), the terms of reuse of such Open Access shall be governed by a Creative Commons licence – details of these licences and which [Creative Commons](#) licence will apply to this Work are set out in our licence referred to above.

Other than as permitted in any relevant BMJ Author's Self Archiving Policies, I confirm this Work has not been accepted for publication elsewhere, is not being considered for publication elsewhere and does not duplicate material already published. I confirm all authors consent to publication of this Work and authorise the granting of this licence.

1  
2 Cohort Profile: South Australian Aboriginal Birth Cohort (SAABC); a prospective  
3  
4 longitudinal birth cohort  
5  
6

7 BMJ Open  
8  
9

10 Lisa Jamieson<sup>1,\*</sup>

11 Joanne Hedges<sup>1</sup>

12 Xiangqun Ju<sup>1</sup>

13 Kostas Kapellas<sup>1</sup>

14 Cathy Leane<sup>2</sup>

15 Dandara Haag<sup>1</sup>

16 Pedro Ribeiro<sup>1</sup>

17 Davi Macedo<sup>1</sup>

18 Rachel Roberts<sup>3</sup>

19 Lisa Smithers<sup>4</sup>  
20  
21  
22  
23  
24  
25  
26  
27

28 1. Australian Research Centre for Population Oral Health

29 Adelaide Dental School

30 University of Adelaide

31 Adelaide, Australia  
32  
33  
34  
35

36 2. Women's and Children's Health Network

37 South Australian Government

38 Adelaide

39 South Australia, Australia  
40  
41  
42  
43

44 3. School of Psychology

45 University of Adelaide

46 Adelaide, Australia  
47  
48  
49  
50

51 4. School of Public Health

52 University of Adelaide

53 Adelaide, Australia  
54  
55  
56

57 \*Corresponding author  
58  
59  
60



1  
2 ABSTRACT:  
3  
4

5  
6 PURPOSE: The South Australian Aboriginal Birth Cohort (SAABC) is a prospective, longitudinal  
7 birth cohort established to: (1) estimate Aboriginal child dental disease compared with population  
8 estimates; (2) determine the efficacy of an early childhood caries intervention in early versus late  
9 infancy; (3) examine if efficacy was sustained over time and; (4) document factors influencing  
10 social, behavioural, cognitive, anthropometric, dietary and educational attainment over time.  
11  
12  
13  
14

15  
16 PARTICIPANTS: The original SAABC comprised 449 women pregnant with an Aboriginal child  
17 recruited Feb 2011 to May 2012. At child age 2 years, 324 participants were retained (74%), at  
18 child age 3 years, 324 participants were retained (74%) and at child age 5 years, 299 participants  
19 were retained (69%). Fieldwork for follow-up at child age 7 years is underway, with funding  
20 available for follow-up at child age 9 years.  
21  
22  
23  
24

25  
26 FINDINGS TO DATE: At baseline, 53% of mothers were aged 14-24 years and 72% had high  
27 school or less educational attainment. At child age 3 years, dental disease experience was higher  
28 among those exposed to the intervention later rather than earlier in infancy. The effect was  
29 sustained at child age 5 years, but rates were still higher than general child population estimates.  
30 Experiences of racism were high among mothers, with impacts on both tooth brushing and  
31 toothache. Compared with population estimates, levels of self-efficacy and self-rated oral health of  
32 mothers at baseline were low.  
33  
34  
35  
36  
37  
38  
39

40  
41 FUTURE PLANS: Our data has contributed to better understanding of the environmental,  
42 behavioural, dietary, biological and psychosocial factors contributing to Aboriginal child oral and  
43 general health, and social and emotional wellbeing. This is beneficial in charting the trajectory of  
44 cohort participants' health and wellbeing overtime, particularly in identifying antecedents of  
45 chronic diseases which are highly prevalent among Aboriginal Australians. Funding for continued  
46 follow-up of the cohort will be sought.  
47  
48  
49  
50

51  
52 REGISTRATION: ACTRN12611000111976.  
53  
54  
55  
56  
57  
58  
59  
60

1  
2 STRENGTHS AND LIMITATIONS OF THIS STUDY:  
3

- 4 ● One of the largest, most contemporary Aboriginal Birth Cohorts in Australia (indeed, of an  
5 Indigenous population in the world), that recruited during pregnancy and that will have follow-ups  
6 at five key time-points (child age 2 years, 3 years, 5 years, 7 years (data currently being collected)  
7 and 9 years (funding available)).  
8  
9 ● Established Aboriginal Reference Group who provide governance and oversight of all study  
10 processes, strong rapport with South Australian Aboriginal community and excellent participant  
11 retention.  
12  
13 ● There are very few insights into Aboriginal child development stemming from prospective  
14 longitudinal birth cohorts; our richly characterised and representative information is able to answer  
15 questions that Aboriginal communities want answered with respect to Aboriginal child health and  
16 development.  
17  
18 ● Small sample size (n=449) due to the small sampling pool who were eligible during recruitment.  
19  
20 ● Follow-up at child age 7 years has been impacted due to social distancing restrictions necessitated  
21 by the COVID-19 pandemic. This may impact our child age 9 years follow-up also.  
22  
23  
24  
25  
26  
27  
28  
29  
30  
31  
32  
33  
34  
35  
36  
37  
38  
39  
40  
41  
42  
43  
44  
45  
46  
47  
48  
49  
50  
51  
52  
53  
54  
55  
56  
57  
58  
59  
60

1  
2 INTRODUCTION: Untreated dental caries (tooth decay) in children may cause substantial pain and  
3 have severe consequences on eating, sleeping, playing, learning and general quality of life.<sup>1</sup> It is  
4 associated with other chronic childhood conditions such as malnutrition, and is the strongest  
5 predictor of poor oral health in adulthood.<sup>2</sup> Childhood caries is entirely preventable, yet Indigenous  
6 Australian children experience high prevalence of the disease, with Indigenous children in some  
7 areas having up to 5 times the prevalence of their non-Indigenous counterparts.<sup>3</sup> In the 2012-14  
8 National Child Oral Health Survey, the mean number of decayed, missing or filled tooth surfaces in  
9 the primary dentition of Indigenous children aged 5 to 10 years was 6.3 compared with 2.9 among  
10 non-Indigenous children.<sup>4</sup>  
11  
12  
13  
14  
15  
16  
17  
18

19 Provision of dental care to young Indigenous children can pose many challenges because of child  
20 stage of emotional and physical development, and consequent capacity for co-operation in the  
21 dental chair. The issues are multiplied for Indigenous children in rural and remote locations, where  
22 access to dental care is severely limited. Hospital-based treatment under general anaesthetic is an  
23 increasingly utilised mode of dental treatment for such children, with Indigenous Australian  
24 children having twice the rate of hospital admissions for dental care than non-Indigenous children.<sup>5</sup>  
25 However, dental treatment under general anaesthetic does not prevent the occurrence of new dental  
26 decay, with children frequently re-admitted for hospital-based dental general anaesthetic after their  
27 initial treatment.<sup>6</sup> Oral rehabilitation under general anaesthetic also does little to alleviate dental fear  
28 or to change non-cooperative behaviour and may, in fact, heighten these characteristics. Moreover,  
29 comprehensive dental care under general anaesthetic is not without risk, including the potential for  
30 long-term adverse neuro-developmental effects.<sup>7-9</sup> Dental general anaesthetics are extremely  
31 expensive for the tax-payer and community more broadly, and require considerable time and  
32 financial investments from carers (to transport child to hospital, stay overnight, ensure fasting prior  
33 to operation etc). The estimated mean cost of dental general anaesthetics for Indigenous children is  
34 substantially higher than the cost of care for non-Indigenous children.<sup>7</sup> Preventive approaches that  
35 can be undertaken in the homes or Aboriginal Community Controlled Health Organisations of  
36 Indigenous children to reduce the number of children undergoing dental general anaesthetics is thus  
37 urgently required.  
38  
39  
40  
41  
42  
43  
44  
45  
46  
47  
48  
49  
50  
51  
52

53 Regrettably, Australian Aboriginal children score worse on almost every indicator of general health  
54 and well-being relative to their non-Aboriginal counterparts. There is a higher prevalence of  
55 nutrition-related stunting, non-optimal blood pressure growth outcomes<sup>10</sup> and poorer social and  
56 emotional wellbeing.<sup>11</sup> Around one-fifth of Aboriginal children are overweight or obese,<sup>12</sup> and  
57 around 30% may not be exercising at recommended levels.<sup>11</sup> Little is known about the dietary  
58  
59  
60

1  
2 patterns of Aboriginal children but there is some evidence of low rates of fruit, vegetables, water  
3 and milk consumption.<sup>13</sup> The literature suggests that many of the conditions experienced in  
4 Aboriginal childhood are antecedents to chronic disease in later life. Recent studies have shown that  
5 growth in childhood, especially rapid weight gain around 4-5 years, is associated with increased risk  
6 of being overweight,<sup>14</sup> elevated blood pressure, clustered metabolic risk,<sup>15</sup> coronary events<sup>16</sup> and  
7 stroke.<sup>17</sup> Data suggest that individuals who are small in the first 2 years of life and subsequently  
8 gain weight rapidly present the greatest levels of risk. Evidence from a recent national report on the  
9 Australian Early Development Census, which contained information on almost 290,000 5-year old  
10 Australian children, indicated that almost half the Aboriginal children were developmentally  
11 vulnerable on one or more of the 5 domains (physical, social, emotional, cognitive/language and  
12 communication). This was more than twice the proportion of non-Aboriginal children.<sup>18</sup>  
13  
14  
15  
16  
17  
18  
19  
20  
21

22 The South Australian Aboriginal Birth Cohort study was established in 2011 to provide direct  
23 estimates of Aboriginal child dental disease in South Australia compared with general population  
24 estimates, to determine if an intervention aiming to reduce prevalence of early childhood caries was  
25 more effective in early versus late infancy, to examine if these differences were sustained over time,  
26 and to document social, behavioural, cognitive, anthropometric, dietary and educational attainment  
27 over time. Funding was originally received in 2011 to establish the cohort and to follow-up at child  
28 ages 2 and 3 years.<sup>19</sup> Further funding was received to follow-up the children at age 5 years, with  
29 current funding received to follow-up the children at age 7 years (currently suspended due to  
30 COVID-19 restrictions) and 9 years.  
31  
32  
33  
34  
35  
36  
37  
38  
39

40 At baseline, 449 women pregnant with an Aboriginal child were recruited and randomly allocated  
41 to either an immediate intervention (n=223) or delayed intervention group (n=225) (Figure 1). The  
42 immediate intervention group received the following:  
43  
44  
45

46  
47 1. Dental care to pregnant mothers: Mothers who were allocated randomly to the immediate  
48 intervention arm and who were eligible for publically-funded dental care (through ownership of a  
49 means-tested Government health care card) received dental care through the South Australian  
50 Dental Service (SADS). Study staff organised transport and appointments, through assistance from  
51 SADS's Aboriginal Liaison Program. Six private dentists provided care to participants who were  
52 not eligible for publically-funded care. Dental care included x-rays, check-ups, scale and  
53 prophylaxis, fillings and extractions (including wisdom teeth). Not provided were cosmetic  
54 dentistry, endodontics and orthodontics.  
55  
56  
57  
58  
59  
60

1  
2 2. Fluoride varnish applied at child ages 6, 12 and 18 months: The protocol for fluoride varnish was  
3 based on that used by Slade and colleagues.<sup>20</sup> Study staff were trained in its use and applied it.

4  
5 Children were supine, with their teeth cleaned and dried with gauze. Fluoride varnish was applied  
6 from the back teeth first, before moving forward to the front teeth. Children (through their carers)  
7 were advised to not eat food or drink for half an hour.  
8  
9

10  
11  
12 3. Anticipatory Guidance: Oral health educational packages that were tailored to contain dental-  
13 specific information relevant for pregnant mothers (focus on dental treatment, pregnancy gingivitis)  
14 and when children were aged 6 months (focus on first solids, caring for baby teeth upon initial  
15 eruption), 12 months (focus on tooth brushing and fluoride, avoiding sugar-containing beverages  
16 and foods) and 18 months (focus on child's first dental check-up, molar teeth eruption).  
17  
18  
19  
20  
21

22  
23 4. Motivational interviewing (MI): In combination with anticipatory guidance, motivational  
24 interviewing was implemented with pregnant mothers and at child ages 6, 12 and 18 months. Study  
25 staff completed an initial two-day MI training course, followed by an intensive one-day follow-up.  
26 One-day follow-up training was continued monthly for six months. This was followed by one-day  
27 coaching every two months, with occasional telephone coaching, for a further year. Each MI  
28 session was conducted on a one-to-one basis in venues where participants felt comfortable (for  
29 example, community halls, local Aboriginal health services, participants' homes). MI sessions  
30 ranged from 30 to 90 minutes. Pictorial prompts and plain English summaries were used.<sup>21</sup> A  
31 member of the Motivational Interviewing Network of Trainers conducted the fidelity testing of the  
32 MI sessions, which was found to be acceptable.<sup>22</sup>  
33  
34  
35  
36  
37  
38  
39  
40

41 When children were aged 24 months, delayed intervention group mothers received dental care.  
42 Fluoride varnish application, anticipatory guidance and motivational interviewing for delayed  
43 intervention participants were delivered when children were aged 24, 30 and 36 months,  
44 respectively.  
45  
46  
47  
48  
49

#### 50 *Statistical Analysis:*

51 Intention-to-treat principles have been used for all data analyses to estimate the effect of the  
52 intervention on dental caries experience. General linear regression models were used to compare the  
53 efficacy of the intervention on mean dmft between immediate and delayed intervention groups at  
54 child age five years. To account for any contributing factors, we adjusted for baseline maternal  
55 socio-demographic, health status and dental behaviour characteristics. The "Proc genmod" function  
56 was used in SAS, with link=identity and distribution=normal, so GLM could be fitted and the least  
57  
58  
59  
60

1 squares estimates obtained. Because, at child age 5 years, nearly one-third of mother-child pairs  
2 were lost to follow-up, a Fully Conditional Specification method was used to impute missing data,  
3 based on the assumption that data was missing at random (MAR). Immediate and delayed  
4 intervention groups were imputed separately. Fifty imputed datasets were created using 50  
5 iterations, with the results from the imputed datasets combined using Rubin's rules via the 'Proc  
6 mianalyse' function. Sensitivity analyses were conducted using the 'MNAR adjust statement', with  
7 different scenarios for dental outcomes, which included different percentages of MAR assumptions  
8 and maximum and minimum value imputations. SAS statistical software (SAS 9.4, SAS Institute  
9 Inc., Cary, NC, USA) was used for all analysis and imputation.  
10  
11  
12  
13  
14  
15  
16  
17

## 18 COHORT DESCRIPTION

19  
20  
21 *Who is in the cohort?* This prospective birth cohort study was developed in partnership with local  
22 Aboriginal communities and endorsed by the study's Aboriginal Reference Group. Ethical  
23 approvals were received from the University of Adelaide Human Research Ethics Committee (H-  
24 057-2010), the Aboriginal Health Council of South Australia (04-09-362), the South Australian  
25 Department for Health, including the human research ethics committees of participating South  
26 Australian hospitals (Flinders Medical Centre: 435-10; Lyell McEwin Hospital: 2010-160; and the  
27 Women's and Children's Hospital: REC2322/11/13). Participants provided signed informed  
28 consent. Participants were 449 women pregnant with an Aboriginal child who were residing in  
29 South Australia during the recruitment period of February 2011 to May 2012. Recruitment was  
30 through the antenatal clinics of South Australian Aboriginal Community Controlled Health  
31 Organisations and hospitals. The sample represented two-thirds of those who were eligible during  
32 the recruitment period, and was representative by age, socio-economic position and tobacco  
33 smoking status.<sup>23</sup> One child passed away in utero and a further 12 passed away before their 2<sup>nd</sup>  
34 birthday. At child age 2 years, 324 participants were followed up (74% retention; Figure 1). At  
35 child age 3 years, 324 participants were followed up (74% retention). At child age 5 years, 299  
36 participants were followed up (69% retention).  
37  
38  
39  
40  
41  
42  
43  
44  
45  
46  
47  
48  
49

50  
51 *How often have they been followed up?* Participants were recruited during pregnancy (baseline) and  
52 have been followed up at child mean ages 2, 3, 5 and 7 years (currently suspended due to COVID-  
53 19). Baseline and loss to follow-up sample characteristics are shown for pregnancy and child ages  
54 2, 3 and 5 years in Table 1. At baseline, over half (53%) of mothers were aged 14 to 24 years and  
55 72% had achieved high school or less as their highest educational attainment. Around 86% received  
56 their income from Centrelink (Government agency who provide welfare based on means testing)  
57 and 82% owned a health-care card (means-tested, allows access to some health services, for  
58  
59  
60

1  
2 example, dental public health services that otherwise incur out-of-pocket expenses). Around 61%  
3 resided in non-metropolitan locations and almost two-thirds (64%) usually visit a dentist because of  
4 a problem. Three-quarters (75%) of mothers reported brushing their teeth the previous day and  
5 while 55% rated their oral health as fair or poor, only 10% rated their general health as fair or poor.  
6  
7 A higher proportion of participants who were not followed-up at child ages two, three and five  
8 years had (at baseline) lower educational attainment, received their income from Centrelink, owned  
9 a healthcare card, resided in metropolitan locations, usually visited a dentist because of a problem,  
10 did not brush their teeth the previous day, rated their oral health as fair or poor and rated their  
11 general health as fair or poor.  
12  
13  
14  
15  
16  
17  
18

19 *What has been measured?* Broad categories of variables collected at baseline and each follow-up  
20 phase are provided in Table 2, with more detail of these variables provided in Table 3. Most items  
21 have been based on those used in other national surveys of child health in Australia, for example,  
22 the Longitudinal Study of Indigenous Children and the National Child Oral Health Survey. Data  
23 linkage to government repositories has been approved and is currently underway, with participant  
24 consent. Details of the government linkage datasets is provided in Table 4. Self-report  
25 questionnaires were completed with the assistance of trained research officers if required. Dental  
26 examinations were standardised and conducted by three calibrated dental professionals. Procedures  
27 appropriate for young children were used when children were aged 2 years and 3 years, for  
28 example, in the 'knee-to-knee' position on their carer's lap. Before examinations, teeth were dried  
29 with cotton pads. Standard infection control procedures were followed and a fibre-optic light used  
30 as a light source. Diagnosis was based on visual criteria only. Any child diagnosed with carious  
31 lesions was referred for dental care through the South Australian Dental Service (provided free of  
32 charge). Weight was measured in duplicate to the nearest 0.1 kg using Seca model 803 scales and  
33 averaged. If measures differed by >0.2 kg, a third measure was taken and the average of the two  
34 closest values used in analyses. Height was measured in duplicate to the nearest 1 mm using a Seca  
35 model 213 portable stadiometer, using a standard anthropometric procedure. If measures differed by  
36 >5 mm a third measurement was taken and the average of the closest two used in analyses. Blood  
37 pressure was measured using a portable oscillometric device (Omron HEM-7211) and a cuff  
38 selected to suit the child's mid-upper arm circumference using a standard protocol.  
39  
40  
41  
42  
43  
44  
45  
46  
47  
48  
49  
50  
51  
52  
53  
54

55 **PATIENT AND PUBLIC INVOLVEMENT:** The study's Aboriginal Reference Group has been  
56 involved in the design, governance and general oversight of all phases of the research to date.  
57 Study participants have been encouraged to communicate to the research team through Facebook  
58 and other social media platforms. Newsletters and community presentations are frequently shared  
59  
60

1  
2 with participants and relevant key stakeholder groups. Members of the study's Aboriginal  
3 Reference Group have presented the study findings at international conferences.  
4  
5

6  
7 FINDINGS TO DATE: The prevalence of mothers who were pregnant with their first child at  
8 baseline was 38.5%. Rates of dental disease among Aboriginal children in South Australia were less  
9 among those exposed to the intervention earlier rather than later in childhood.<sup>24, 25</sup> The effect  
10 appeared to be sustained at child age 5 years, although the rates of dental disease were still far  
11 higher than estimates reported in Australia's National Child Oral Health Survey 2012-14.<sup>26</sup> Rates of  
12 psychosocial stress among mothers pregnant with Aboriginal children were high compared with  
13 general Australian population estimates.<sup>27</sup> Experiences of racism were high among mothers, with  
14 impacts on tooth brushing behaviours<sup>28</sup> and experience of toothache.<sup>29</sup> Compared with population  
15 estimates, levels of self-efficacy and self-rated oral health of study participants at baseline were  
16 low,<sup>30</sup> with differences in the frame of reference regarding participants' self-rated oral health and  
17 self-rated general health described.<sup>31</sup> Smithers and colleagues reported that the proportion of total  
18 energy from discretionary foods (including sugars in discretionary foods) was far higher for study  
19 children at age 3 years than for non-Aboriginal Australian children.<sup>32</sup> Haag and others described  
20 how breastfeeding >24 months was associated with higher dental caries prevalence at child age 3  
21 years compared with children who were never breastfed.<sup>33</sup> This is contrary to the many findings that  
22 support prolonged breastfeeding among Indigenous Australians for better child health outcomes.  
23 Santiago and colleagues demonstrated how social support was characterised among study  
24 participants,<sup>34</sup> and the impact of personal control on self-reported health outcomes.<sup>35</sup> The  
25 effectiveness of implementing a motivational interviewing approach to preventing poor oral health  
26 among Indigenous children and their families was discussed,<sup>22</sup> with comparisons made with other  
27 studies involving motivational interviewing and the oral health of vulnerable children.<sup>36</sup>  
28  
29  
30  
31  
32  
33  
34  
35  
36  
37  
38  
39  
40  
41  
42  
43  
44

45 STRENGTHS AND LIMITATIONS: The main strength of the study is the Aboriginal community  
46 engagement, involvement and partnership, orchestrated through the study's Aboriginal Reference  
47 Group, through the Aboriginal Community Controlled Health Organisation stakeholder groups and  
48 by the Senior Aboriginal research officer (JH). This has, without doubt, contributed to the excellent  
49 follow-up rates, which need to be taken into context. For example, this cohort study has been  
50 undertaken over vast distances (e.g. travelling 700 km to the west of South Australia, 400 km east,  
51 800 km north), involving highly disadvantaged participants who have not always enjoyed positive  
52 research interactions. The fact that participants represented two-thirds of those eligible to be  
53 recruited during the recruitment period demonstrates the widespread community support and  
54 generalisability of the results. The main limitation is the small sample size, which was essentially  
55  
56  
57  
58  
59  
60



1 limited by the small population size of Aboriginal people in South Australia (around 2% of the total  
2 population). That we were able to recruit two thirds of those who were eligible at baseline (and have  
3 had strong retention of participants since) suggests that had the target population size been larger at  
4 baseline, the sample size of our study would consequently also be larger. Participants reported that  
5 the dietary recalls (collected at child age 2 years) were burdensome and this may have increased  
6 non-response or socially desirable responses. At the time of writing, follow-up at child age 7 years  
7 was suspended due to social distancing restrictions necessitated by the COVID-19 pandemic. This  
8 may impact our child age 9 years follow-up also.

17 CONTRIBUTORSHIP STATEMENT: Conceptualization, LMJ, JH, XJ, KK, CL, DH, PR, DM,  
18 RR, LS; methodology, XJ, DH, LS, LMJ; resources, LMJ; data curation, LMJ, JH, XJ, KK, CL,  
19 DH, PR, DM, RR, LS; writing—original draft preparation, LMJ; writing—review and editing, JH,  
20 XJ, KK, CL, DH, PR, DM, RR, LS; visualization, LMJ, JH, XJ, KK, CL, DH, PR, DM, RR, LS. All  
21 authors have read and agreed to the published version of the manuscript.

27 COMPETING INTERESTS: The authors declare no competing interests

31 FUNDING: This study was funded by the National Health and Medical Research Council of  
32 Australia (NHMRC, Project Grants 627350 and 1153662) and a Channel 7 Children's Research  
33 Foundation grant (10547012). LMJ is supported by a NHMRC Senior Research Fellowship.

38 DATA SHARING STATEMENT: Study data are not freely available because of ethical and data  
39 protection constraints. The de-identified data are stored at the University of Adelaide and cannot be  
40 sent outside the institution. Proposals for possible collaborations in further analyses of the data  
41 should be addressed to Lisa Jamieson (lisa.jamieson@adelaide.edu.au)  
42 and will be reviewed by the SAABC research team and Aboriginal Reference Group.

48 ACKNOWLEDGEMENTS: The authors gratefully acknowledge the support of the South  
49 Australian Aboriginal Birth Cohort study participants, study staff and partners: South Australian  
50 Dental Service, Colgate Palmolive, Women's and Children's Hospital, Lyell McEwen Hospital,  
51 Flinders' Medical Centre, Aboriginal Family Support Services, Aboriginal Primary Health Unit,  
52 Metro Aboriginal Family Birthing Program, Kura Yerlo Centre, Aboriginal Legal Rights  
53 Movement, Wodlitinattoai Program, Ninko Kutangga Patpangga, Kanggawodli Step Down Service,  
54 Kaurna Plains, Fleurieu Families, Gilles Plains Community Health, MADEC Community Support  
55 Services, Naporendi Aboriginal Forum, Nunga MiMinar, Aboriginal Strategy Unit of Families

1  
2 South Australia, Inbarendi College, Para West Adult Campus, Pangula Mannanurna Aboriginal  
3 Health Corporation and the Muno Parra Medical Centre, Second Story, Inner Southern Health  
4 Service, The Corner House, Louise Place, PARKS, Talking Realities Program, Child Youth  
5 Women's Health Services, Southern Junction Community Services, TAFE campuses, GP Plus  
6 centres, employment programs, childcare centres, women's centres, domestic violence shelters, and  
7 primary and high schools.  
8  
9  
10  
11  
12  
13  
14  
15  
16  
17  
18  
19  
20  
21  
22  
23  
24  
25  
26  
27  
28  
29  
30  
31  
32  
33  
34  
35  
36  
37  
38  
39  
40  
41  
42  
43  
44  
45  
46  
47  
48  
49  
50  
51  
52  
53  
54  
55  
56  
57  
58  
59  
60

For peer review only

1  
2 **FIGURE LEGEND:**

3  
4 **Figure 1: Flow diagram of participants through key stages of the study**

5  
6 Intervention comprised: (1) dental care to mother; (2) Anticipatory guidance (mother); 3) Motivational  
7 interviewing (mother) and; (4) Fluoride varnish application (child).

8  
9 Intervention delivered during pregnancy to child aged 18 months for immediate intervention group, at child  
10 aged 24 to 36 months for delayed intervention group.  
11  
12  
13  
14  
15  
16  
17  
18  
19  
20  
21  
22  
23  
24  
25  
26  
27  
28  
29  
30  
31  
32  
33  
34  
35  
36  
37  
38  
39  
40  
41  
42  
43  
44  
45  
46  
47  
48  
49  
50  
51  
52  
53  
54  
55  
56  
57  
58  
59  
60

For peer review only

1  
2 REFERENCES

- 3  
4 1. Peres MA, Macpherson LMD, Weyant RJ, Daly B, Venturelli R, Mathur MR, Listl S, Celeste  
5 RK, Guarnizo-Herreño CC, Kearns C, Benzian H, Allison P, Watt RG. Oral diseases: a global  
6 public health challenge. *Lancet*. 2019;**394**:249-260.  
7  
8  
9  
10 2. Isaksson H, Alm A, Koch G, Birkhed D, Wendt LK. Caries prevalence in Swedish 20-year-olds  
11 in relation to their previous caries experience. *Caries Res*. 2013; **47**:234-242.  
12  
13  
14  
15 3. Jamieson LM, Armfield JM, Roberts-Thomson KF. Oral health inequalities among indigenous  
16 and nonindigenous children in the Northern Territory of Australia. *Community Dent Oral*  
17 *Epidemiol*. 2006; **34** :267-276.  
18  
19  
20  
21  
22 4. Do LG, Spencer AJ. *Oral health of Australian children: the National Child Oral Health Study*  
23 *2012–14*. Adelaide: University of Adelaide Press, 2016.  
24  
25  
26  
27 5. Australian Institute of Health and Welfare. *Oral health and dental care in Australia: key facts*  
28 *and figures trends 2014*. Canberra: AIHW; 2014.  
29  
30  
31  
32  
33 6. Tahmassebi JF, Achol LT, Fayle SA. Analysis of dental care of children receiving  
34 comprehensive care under general anaesthesia at a teaching hospital in England. *Eur Arch Paediatr*  
35 *Dent* 2014;**15**:353–360.  
36  
37  
38  
39  
40 7. Alsharif AT, Kruger E, Tennant M. A population-based cost description study of oral treatment  
41 of hospitalized Western Australian children aged younger than 15 years. *J Public Health Dent*  
42 2015;**75**:202–209.  
43  
44  
45  
46  
47 8. Lee HH, Milgrom P, Starks H, Burke W. Trends in death associated with pediatric dental  
48 sedation and general anesthesia. *Paediatr Anaesth* 2013;**23**:741-746.  
49  
50  
51  
52 9. Ing C, DiMaggio C, Whitehouse A, Hegarty MK, Brady J, von Ungern-Sternberg BS, Davidson  
53 A, Wood AJ, Li G, Sun LS. Long-term differences in language and cognitive function after  
54 childhood exposure to anesthesia. *Pediatrics* 2012;**130**; e476-e485.  
55  
56  
57  
58  
59  
60

- 1  
2 10. Haysom L, Williams R, Hodson EM, Lopez-Vargas PA, Roy LP, Lyie DM, Craig JC. Natural  
3 history of chronic kidney disease in Australian Indigenous and non-Indigenous children: a 4-year  
4 population-based follow-up study. *Med J Aust*. 2009;190:303-306.  
5  
6  
7  
8  
9 11. Blair EM, Zubrick SR, Cox AH. The Western Australian Aboriginal Child Health Survey:  
10 findings to date on adolescents. *Med J Aust*. 2005; 183:433-435.  
11  
12  
13  
14 12. Heath DL, Panaretto KS. Nutrition status of primary school children in Townsville. *Aust J*  
15 *Rural Health*. 2005; 13:282-289.  
16  
17  
18  
19 13. Zubrick SR, Lawrence DM, Silburn SR, Blair E, Milroy H, Wilkes T, Eades S, D'Antoine H,  
20 Read A, Ishiguchi P, Doyle S. The Western Australian Aboriginal Child Health Survey: The Health  
21 of Aboriginal Children and Young People. Perth: Telethon Institute for Child Health Research.  
22 2004.  
23  
24  
25  
26  
27  
28 14. Victora CG, Adair L, Fall C, Hallal PC, Martorell R, Richter L, Sachdev HS. Maternal and  
29 child undernutrition: consequences for adult health and human capital. *Lancet* 2008; **371**:340–357.  
30  
31  
32  
33 15. Ekelund UIF, Ong KK, Linne Y, Neovius M, Brage S, Dunger DB, Wareham NJ, Rossner S.  
34 Association of weight gain in infancy and early childhood with metabolic risk in young adults. *J*  
35 *Clin Endocrinol Metab* 2007;**92**:98–103.  
36  
37  
38  
39  
40 16. Barker DJP, Osmond C, Forsen TJ, Kajantie E, Eriksson JG. Trajectories of growth among  
41 children who have coronary events as adults. *N Engl J Med* 2005; **353**:1802–1809.  
42  
43  
44  
45 17. Osmond C, Kajantie E, Forsen TJ, Eriksson JG, Barker DJP. Infant growth and stroke in adult  
46 life: the Helsinki birth cohort study. *Stroke* 2007; **38**:264–270.  
47  
48  
49  
50 18 Australian Government Department of Education. *Australian Early Development Census*  
51 *National Report 2018*. Canberra: Australian Government Department of Education, 2019.  
52  
53  
54  
55 19. Merrick J, Chong A, Parker E, Roberts-Thomson K, Misan G, Spencer J, Broughton  
56 J, Lawrence H, Jamieson L. Reducing disease burden and health inequalities arising from chronic  
57 disease among Indigenous children: an early childhood caries intervention. *BMC Public*  
58 *Health*. 2012;12:323.  
59  
60

- 1  
2  
3  
4 20. Slade GD, Bailie RS, Roberts-Thomson K, Leach AJ, Raye I, Endean C. Effect of health  
5 promotion and fluoride varnish on dental caries among Australian Aboriginal  
6 children: results from a community-randomized controlled trial. *Community Dent*  
7 *Oral Epidemiol* 2011; 39:29–43.  
8  
9  
10  
11  
12 21. Venner KL, Feldstein SW, Tafoya N. Native American motivational interviewing: weaving  
13 native American and western practices. Albuquerque: University of New Mexico, Center on  
14 Alcoholism, Substance Abuse and Addictions, Department of Psychology; 2006.  
15  
16  
17  
18  
19 22. Jamieson L, Bradshaw J, Lawrence H, et al. Fidelity of motivational interviewing in an early  
20 childhood caries intervention involving indigenous Australian mothers. *J Health Care Poor*  
21 *Underserved* 2016;27: 125–38.  
22  
23  
24  
25  
26 23. Government of South Australia. *Pregnancy Outcome in South Australia 2011*. Adelaide:  
27 Government of South Australia; 2013.  
28  
29  
30  
31 24. Jamieson L, Smithers L, Hedges J, Parker E, Mills H, Kapellas K, Lawrence HP, Broughton JR,  
32 Ju X. Dental Disease Outcomes Following a 2-Year Oral Health Promotion Program for Australian  
33 Aboriginal Children and Their Families: A 2-Arm Parallel, Single-blind, Randomised Controlled  
34 Trial. *EClinicalMedicine*. 2018; 1:43-50.  
35  
36  
37  
38  
39  
40 25. Jamieson LM, Smithers LG, Hedges J, Aldis J, Mills H, Kapellas K, Lawrence HP, Broughton  
41 JR, Ju X. Follow-up of an Intervention to Reduce Dental Caries in Indigenous Australian Children:  
42 A Secondary Analysis of a Randomized Clinical Trial. *JAMA Netw Open*. 2019;2: e190648.  
43  
44  
45  
46  
47 26. Jamieson L, Smithers L, Hedges J, Mills H, Kapellas K, Ha D, Do L, Ju X. Follow-up of  
48 Intervention to Prevent Dental Caries Among Indigenous Children in Australia: A Secondary  
49 Analysis of a Randomized Clinical Trial. *JAMA Netw Open*. 2019;2:e1915611.  
50  
51  
52  
53  
54 27. Santiago PHR, Roberts R, Smithers LG, Jamieson L. Stress beyond coping? A Rasch analysis  
55 of the Perceived Stress Scale (PSS-14) in an Aboriginal population. *PLoS One*. 2019;14: e0216333.  
56  
57  
58  
59  
60

- 1  
2 28. Ben J, Jamieson LM, Priest N, Parker EJ, Roberts-Thomson KF, Lawrence HP, Broughton J,  
3 Paradies Y. Experience of racism and tooth brushing among pregnant Aboriginal Australians:  
4 exploring psychosocial mediators. *Community Dent Health*. 2014b; 31:145  
5  
6  
7  
8  
9 29. Ben J, Paradies Y, Priest N, Parker EJ, Roberts-Thomson KF, Lawrence HP, Broughton J,  
10 Jamieson LM. Self-reported racism and experience of toothache among pregnant Aboriginal  
11 Australians: the role of perceived stress, sense of control, and social support. *J Public Health Dent*.  
12 2014b; 74:301-9.  
13  
14  
15  
16  
17 30. Jamieson LM, Parker EJ, Roberts-Thomson KF, Lawrence HP, Broughton J. Self-efficacy and  
18 self-rated oral health among pregnant aboriginal Australian women. *BMC Oral Health*. 2014;  
19 14:29.  
20  
21  
22  
23  
24 31. Chand R, Parker E, Jamieson L. Differences in, and Frames of Reference of, Indigenous  
25 Australians' Self-rated General and Oral Health. *J Health Care Poor Underserved*. 2017; 28:1087-  
26 1103.  
27  
28  
29  
30  
31 32. Smithers LG, Lynch J, Hedges J, Jamieson LM. Diet and anthropometry at 2 years of age  
32 following an oral health promotion programme for Australian Aboriginal children and their carers:  
33 a randomised controlled trial. *Br J Nutr*. 2017; 118:1061-1069.  
34  
35  
36  
37  
38 33. Haag DG, Jamieson LM, Hedges J, Smithers LG. Is There an Association between  
39 Breastfeeding and Dental Caries among Three-Year-Old Australian Aboriginal Children? *Nutrients*.  
40 2019;11.  
41  
42  
43  
44  
45 34. Santiago PHR, Roberts R, Smithers LG, Jamieson L. Networks of support: psychometric  
46 properties of the Social Support Scale (SSS) in two Aboriginal samples. *Australian and New*  
47 *Zealand Journal of Psychiatry*. In Press.  
48  
49  
50  
51  
52 35. Santiago PHR, Nielsen T, Roberts R, Smithers LG, Jamieson L. Sense of Personal Control: can  
53 it be assessed fairly across Aboriginal and non-Aboriginal Australians? *PloS One*. In Press.  
54  
55  
56  
57 36. Jamieson LM, Garcia RI, Sohn W, Albino J. Challenges and Solutions for Improved Oral  
58 Health: Examples from Motivational Interviewing Trials. *JDR Clin Trans Res*. 2020;5:107-108.  
59  
60

Table 1. Baseline and follow-up/loss to follow-up characteristics at child age 2 years, 3 years and 5 years

|                                   | Baseline<br>(pregnancy)<br>(n=448) | Child age 2<br>years follow-up<br>(n=324) | Child age 2 years<br>loss to follow-up<br>(n=112) | Child age 3<br>years follow-up<br>(n=324) | Child age 3 years<br>loss to follow-up<br>(n=112) | Child age 5<br>years follow-up<br>(n=299) | Child age 5 years<br>loss to follow-up<br>(n=137) |
|-----------------------------------|------------------------------------|-------------------------------------------|---------------------------------------------------|-------------------------------------------|---------------------------------------------------|-------------------------------------------|---------------------------------------------------|
| <b>Maternal age</b>               |                                    |                                           |                                                   |                                           |                                                   |                                           |                                                   |
| 14-24                             | 238 (53.1)                         | 172 (53.1)                                | 66 (53.2)                                         | 173 (53.2)                                | 59 (52.7)                                         | 156 (52.2)                                | 76 (55.5)                                         |
| 25+                               | 210 (46.9)                         | 152 (46.9)                                | 58 (46.8)                                         | 152 (46.8)                                | 53 (47.3)                                         | 143 (47.8)                                | 61 (44.5)                                         |
| <b>Education</b>                  |                                    |                                           |                                                   |                                           |                                                   |                                           |                                                   |
| High school or less               | 322 (72.4)                         | 226 (70.0)                                | 88 (79.3)                                         | 232 (72.1)                                | 82 (73.2)                                         | 203 (68.4)                                | 111 (81.0)                                        |
| Trade or University               | 123 (27.6)                         | 97 (30.0)                                 | 23 (20.7)                                         | 90 (28.0)                                 | 30 (26.8)                                         | 94 (31.7)                                 | 26 (19.0)                                         |
| <b>Income</b>                     |                                    |                                           |                                                   |                                           |                                                   |                                           |                                                   |
| Job                               | 62 (14.0)                          | 56 (17.34)                                | 4 (3.7)                                           | 55 (17.1)                                 | 5 (4.5)                                           | 47 (15.9)                                 | 13 (9.6)                                          |
| Centrelink                        | 381 (86.0)                         | 267 (82.7)                                | 105 (96.3)                                        | 267 (82.9)                                | 106 (95.5)                                        | 249 (84.1)                                | 123 (90.4)                                        |
| <b>HCC status</b>                 |                                    |                                           |                                                   |                                           |                                                   |                                           |                                                   |
| Yes                               | 358 (82.2)                         | 254 (79.9)                                | 95 (89.6)                                         | 252 (79.3)                                | 97 (91.5)                                         | 236 (80.8)                                | 113 (85.6)                                        |
| No                                | 77 (17.8)                          | 64 (20.1)                                 | 11 (10.4)                                         | 66 (20.8)                                 | 9 (8.5)                                           | 56 (19.2)                                 | 19 (14.4)                                         |
| <b>Residential location</b>       |                                    |                                           |                                                   |                                           |                                                   |                                           |                                                   |
| Metropolitan                      | 171 (38.7)                         | 116 (36.3)                                | 55 (45.1)                                         | 116 (36.1)                                | 51 (46.0)                                         | 132 (44.8)                                | 35 (25.7)                                         |
| Non- metropolitan                 | 271 (61.3)                         | 204 (63.8)                                | 67 (54.9)                                         | 205 (63.9)                                | 60 (54.1)                                         | 163 (55.2)                                | 101 (74.3)                                        |
| <b>Usual reason visit dentist</b> |                                    |                                           |                                                   |                                           |                                                   |                                           |                                                   |
| Problem                           | 275 (64.0)                         | 195 (61.9)                                | 72 (69.2)                                         | 194 (62.4)                                | 74 (67.9)                                         | 184 (63.7)                                | 83 (63.8)                                         |
| Check-up                          | 155 (36.1)                         | 120 (38.1)                                | 32 (30.8)                                         | 117 (37.6)                                | 35 (32.1)                                         | 105 (36.3)                                | 47 (36.2)                                         |
| <b>Brush yesterday</b>            |                                    |                                           |                                                   |                                           |                                                   |                                           |                                                   |
| Yes                               | 321 (75.0)                         | 239 (76.0)                                | 74 (69.8)                                         | 240 (77.4)                                | 74 (67.9)                                         | 217 (75.9)                                | 96 (72.7)                                         |
| No                                | 107 (25.0)                         | 73 (23.4)                                 | 32 (30.2)                                         | 70 (22.6)                                 | 35 (32.1)                                         | 69 (24.1)                                 | 36 (27.3)                                         |
| <b>Self-rated oral health</b>     |                                    |                                           |                                                   |                                           |                                                   |                                           |                                                   |
| Excellent, very good or good      | 203 (45.3)                         | 153 (47.2)                                | 43 (38.4)                                         | 151 (46.5)                                | 46 (41.1)                                         | 130 (43.5)                                | 66 (48.2)                                         |
| Fair or poor                      | 245 (54.7)                         | 171 (52.8)                                | 69 (61.6)                                         | 174 (53.5)                                | 66 (58.9)                                         | 169 (56.5)                                | 71 (51.8)                                         |
| <b>Self-rated general health</b>  |                                    |                                           |                                                   |                                           |                                                   |                                           |                                                   |
| Excellent, very good or good      | 402 (89.9)                         | 294 (91.0)                                | 97 (86.6)                                         | 298 (92.0)                                | 94 (83.9)                                         | 272 (91.0)                                | 119 (87.5)                                        |
| Fair or poor                      | 45 (10.1)                          | 29 (9.0)                                  | 15 (13.4)                                         | 26 (8.0)                                  | 18 (16.1)                                         | 27 (9.0)                                  | 17 (12.5)                                         |



Table 2. Broad categories of variables collected at baseline and each follow-up phase

| Phase                  | Measurements                                                                                                                                                                                                                                                                                                                                                                                                                                                                                                                                                                                                                                                                                                                                                  |
|------------------------|---------------------------------------------------------------------------------------------------------------------------------------------------------------------------------------------------------------------------------------------------------------------------------------------------------------------------------------------------------------------------------------------------------------------------------------------------------------------------------------------------------------------------------------------------------------------------------------------------------------------------------------------------------------------------------------------------------------------------------------------------------------|
| Baseline               | Mother self-reported questionnaire <ul style="list-style-type: none"> <li>• Dental treatment needs, oral health-related behaviours, maternal oral self-efficacy, self-rated oral health and oral health related quality of life.</li> <li>• General health conditions, health-related behaviours and self-rated general health.</li> <li>• Socioeconomic and psychosocial factors, including income, education, employment, experience of racism and cultural identity.</li> </ul>                                                                                                                                                                                                                                                                            |
| Child mean age 2 years | Carer self-reported questionnaire <ul style="list-style-type: none"> <li>• Dental treatment needs, oral health-related behaviours, maternal oral health literacy, self-efficacy, dental perceptions, self-rated oral health and oral health related quality of life.</li> <li>• General health conditions (mother and child), health-related behaviours, physical activity, self-rated general health, 24-hour dietary recalls (child), breastfeeding habits.</li> <li>• Socioeconomic and psychosocial factors, including income, education, employment, experience of racism and cultural identity.</li> <li>• Family functioning and home environment</li> </ul> Child height, weight, blood pressure, upper arm circumference<br>Child dental examination |
| Child mean age 3 years | Carer self-reported questionnaire <ul style="list-style-type: none"> <li>• Dental treatment needs, oral health-related behaviours, maternal oral health literacy, self-efficacy, dental perceptions, self-rated oral health and oral health related quality of life.</li> <li>• General health conditions (mother and child), health-related behaviours, physical activity, self-rated general health and dietary habits</li> <li>• Socioeconomic factors.</li> </ul> Child height, weight, blood pressure, upper arm circumference<br>Child dental examination                                                                                                                                                                                               |
| Child mean age 5 years | Carer self-reported questionnaire <ul style="list-style-type: none"> <li>• Dental treatment needs, oral health-related behaviours, maternal oral health literacy, self-efficacy, dental perceptions, self-rated oral health and oral health related quality of life.</li> <li>• General health conditions (mother and child), health-related behaviours, physical activity, self-rated general health and dietary habits.</li> <li>• Socioeconomic factors.</li> <li>• Family functioning and home environment.</li> <li>• Child socioemotional well-being and cognitive outcomes.</li> </ul> Child height, weight, blood pressure, upper arm circumference<br>Child dental examination                                                                       |

|                                                                                                                                                                                                                                                                                                                                                                                                                                                             |                                                                                                                                                                                                                                                                                                                                                                                                                                                                                                                                                                                                                                                                                                        |
|-------------------------------------------------------------------------------------------------------------------------------------------------------------------------------------------------------------------------------------------------------------------------------------------------------------------------------------------------------------------------------------------------------------------------------------------------------------|--------------------------------------------------------------------------------------------------------------------------------------------------------------------------------------------------------------------------------------------------------------------------------------------------------------------------------------------------------------------------------------------------------------------------------------------------------------------------------------------------------------------------------------------------------------------------------------------------------------------------------------------------------------------------------------------------------|
| <p>1<br/>2<br/>3<br/>4<br/>5<br/>6<br/>7<br/>8<br/>9<br/>10<br/>11<br/>12<br/>13<br/>14<br/>15<br/>16<br/>17<br/>18<br/>19<br/>20<br/>21<br/>22<br/>23<br/>24<br/>25<br/>26<br/>27<br/>28<br/>29<br/>30<br/>31<br/>32<br/>33<br/>34<br/>35<br/>36<br/>37<br/>38<br/>39<br/>40<br/>41<br/>42<br/>43<br/>44<br/>45<br/>46<br/>47<br/>48<br/>49<br/>50<br/>51<br/>52<br/>53<br/>54<br/>55<br/>56<br/>57<br/>58<br/>59<br/>60</p> <p>Child mean age 7 years</p> | <p>Carer self-reported questionnaire</p> <ul style="list-style-type: none"> <li>• Dental treatment needs, oral health-related behaviours, maternal oral health literacy, self-efficacy, dental perceptions, self-rated oral health and oral health related quality of life.</li> <li>• General health conditions (mother and child), health-related behaviours, physical activity, self-rated general health and dietary habits.</li> <li>• Socioeconomic factors.</li> <li>• Family functioning and home environment.</li> <li>• Child socioemotional well-being and cognitive outcomes.</li> </ul> <p>Child height, weight, blood pressure, upper arm circumference<br/>Child dental examination</p> |
|-------------------------------------------------------------------------------------------------------------------------------------------------------------------------------------------------------------------------------------------------------------------------------------------------------------------------------------------------------------------------------------------------------------------------------------------------------------|--------------------------------------------------------------------------------------------------------------------------------------------------------------------------------------------------------------------------------------------------------------------------------------------------------------------------------------------------------------------------------------------------------------------------------------------------------------------------------------------------------------------------------------------------------------------------------------------------------------------------------------------------------------------------------------------------------|

For peer review only

1  
2  
3  
4  
5  
6  
7  
8  
9  
10  
11  
12  
13  
14  
15  
16  
17  
18  
19  
20  
21  
22  
23  
24  
25  
26  
27  
28  
29  
30  
31  
32  
33  
34  
35  
36  
37  
38  
39  
40  
41  
42  
43  
44  
45  
46  
47  
48  
49  
50  
51  
52  
53  
54  
55  
56  
57  
58  
59  
60

Table 3. Detail of variables collected at baseline and each follow-up phase

|                                                                                        | Baseline<br>(Pregnancy<br>n=449) | 2 years<br>(n=324) | 3 years<br>(n=324) | 5 years<br>(n=299) | 7 years<br>(ongoing) |
|----------------------------------------------------------------------------------------|----------------------------------|--------------------|--------------------|--------------------|----------------------|
| <b>Oral health-related variables</b>                                                   |                                  |                    |                    |                    |                      |
| Dental examinations (child- dental caries, gingivitis, trauma)                         |                                  | ✓                  | ✓                  | ✓                  | ✓                    |
| Dental treatment needs (mother and child)                                              | ✓                                | ✓                  | ✓                  | ✓                  | ✓                    |
| Oral health-related behaviours (oral hygiene habits)                                   | ✓                                | ✓                  | ✓                  | ✓                  | ✓                    |
| Oral health self-efficacy (mother)                                                     | ✓                                | ✓                  | ✓                  | ✓                  |                      |
| Oral health literacy (mother)                                                          |                                  | ✓                  | ✓                  | ✓                  |                      |
| Knowledge of children's oral health (mother)                                           | ✓                                | ✓                  | ✓                  | ✓                  |                      |
| Oral health fatalism (mother and child)                                                | ✓                                | ✓                  | ✓                  | ✓                  |                      |
| Dental perceptions                                                                     |                                  |                    | ✓                  |                    |                      |
| Oral health-related quality of life (mother and child)                                 | ✓                                | ✓                  | ✓                  | ✓                  | ✓                    |
| <b>General health</b>                                                                  |                                  |                    |                    |                    |                      |
| Anthropometric measurements (height weight, arm circumference, blood pressure) (child) |                                  | ✓                  | ✓                  | ✓                  | ✓                    |
| General health conditions and hospitalisations (child)                                 | ✓                                | ✓                  | ✓                  | ✓                  | ✓                    |
| Health-related behaviours (smoking, alcohol intake) (mother)                           | ✓                                | ✓                  | ✓                  | ✓                  | ✓                    |
| Physical activity (child)                                                              |                                  |                    | ✓                  | ✓                  |                      |
| Self-rated general and oral health (mother and child)                                  | ✓                                | ✓                  | ✓                  | ✓                  | ✓                    |
| 24-hour dietary recalls (child)                                                        |                                  | ✓                  |                    |                    |                      |
| Breastfeeding habits (child)                                                           |                                  | ✓                  |                    |                    |                      |
| Other dietary-related habits (mother and child)                                        | ✓                                | ✓                  | ✓                  | ✓                  | ✓                    |
| <b>Socioeconomic and psychosocial factors</b>                                          |                                  |                    |                    |                    |                      |
| Income, education, socioeconomic hardship, employment (mother)                         | ✓                                | ✓                  | ✓                  | ✓                  | ✓                    |
| Experience of Racism (mother)                                                          | ✓                                | ✓                  |                    |                    | ✓                    |

|                                                              |   |   |  |   |   |
|--------------------------------------------------------------|---|---|--|---|---|
| Cultural identity (mother)                                   | ✓ | ✓ |  |   |   |
| Self-stem (child)                                            |   |   |  |   | ✓ |
| Social support and sense of self-control (mother)            | ✓ |   |  |   |   |
| Family functioning and home environment                      |   |   |  |   |   |
| Parental functioning and home environment (mother and child) |   | ✓ |  | ✓ | ✓ |
| Time-use diaries (child)                                     |   |   |  |   | ✓ |
| Child development                                            |   |   |  |   |   |
| Cognitive outcomes (child)                                   |   |   |  | ✓ | ✓ |
| Social and emotional well-being (child)                      |   |   |  | ✓ | ✓ |

Table 4. Datasets to be included in data linkage

| Database domain                                 | Types of information                                                                                                                                |
|-------------------------------------------------|-----------------------------------------------------------------------------------------------------------------------------------------------------|
| Hospital admissions                             | Length of stay, ICD codes describing each hospitalisation event                                                                                     |
| Presentations at hospital emergency departments | Presenting problem, diagnosis                                                                                                                       |
| Well-child health checks                        | Child growth and development collected by nurses at routine health checks and ad hoc visits to local health clinics                                 |
| Perinatal information                           | Medical information about pregnancy and child's birth                                                                                               |
| Public dental care                              | Dental treatments received by child in public dental clinics                                                                                        |
| School Enrolment                                | Information provided by carers at the time the child was enrolled at school including carer education, languages spoken at home and school absences |
| Literacy and Numeracy                           | Results on reading, writing and numeracy collected from a national assessment program when child is in year 3 (approximate age 8) at school         |
| Housing                                         | Information about families living in homes provided by the government                                                                               |

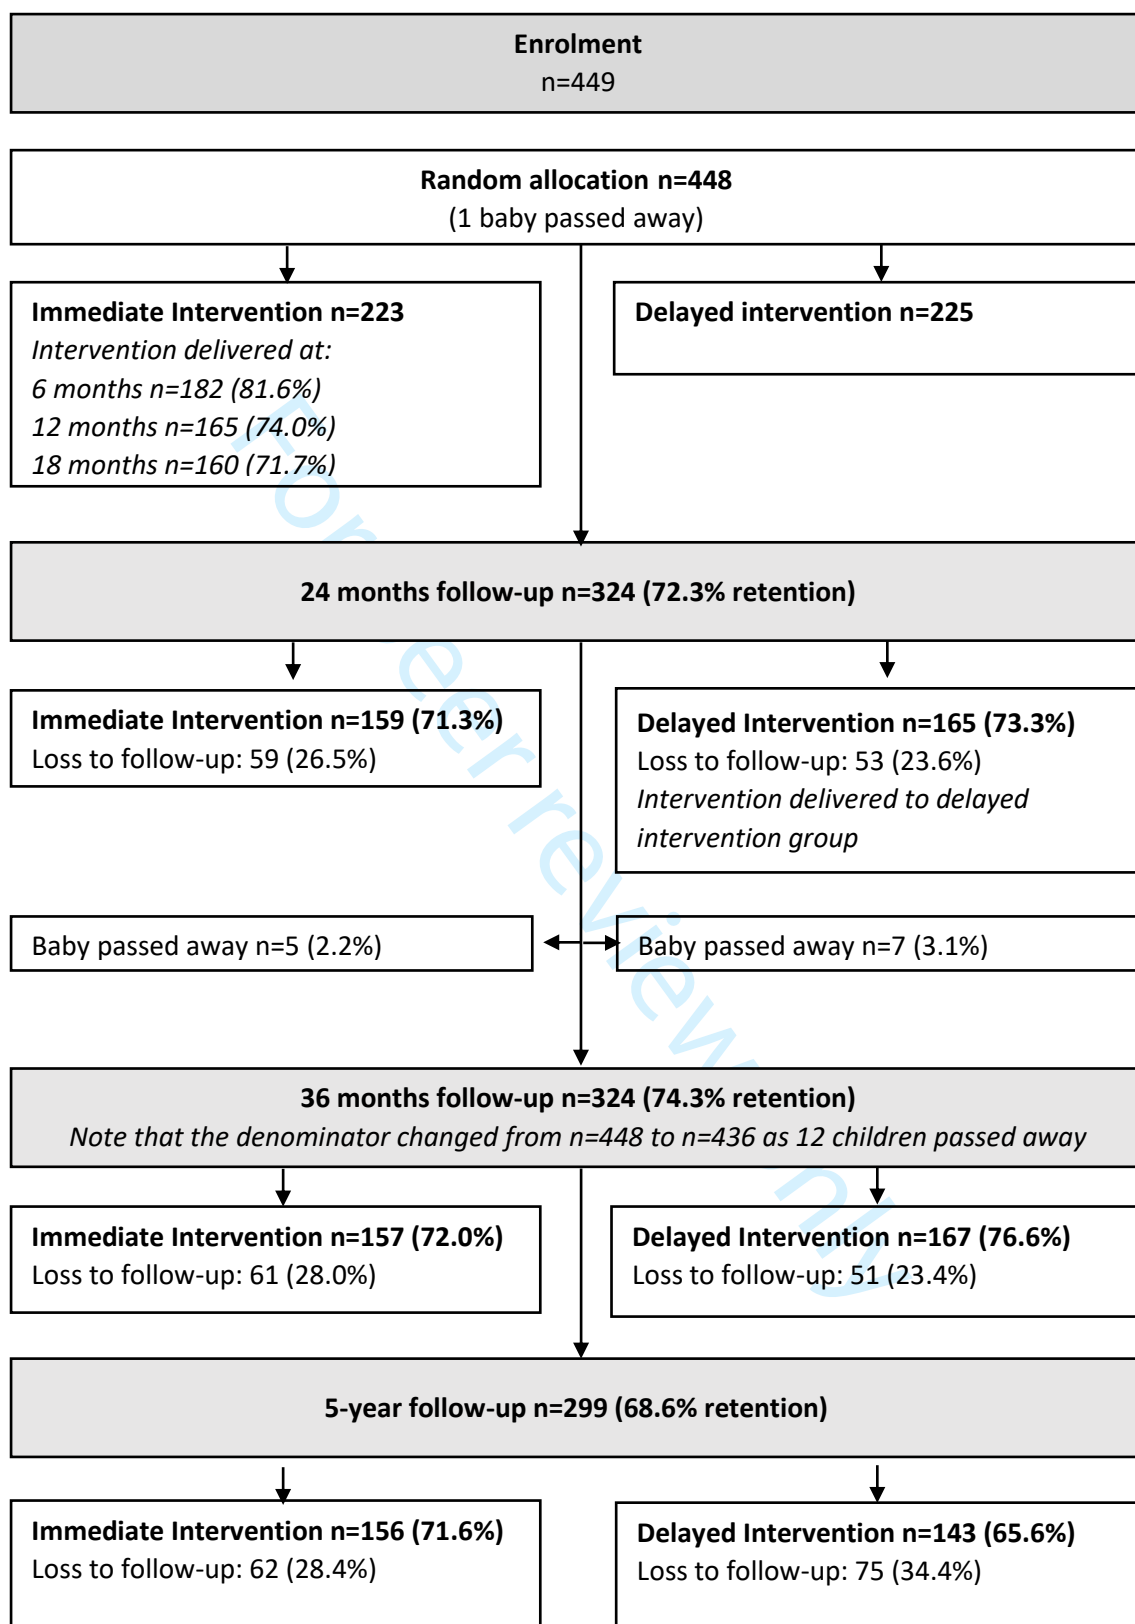

# BMJ Open

## Cohort Profile: South Australian Aboriginal Birth Cohort (SAABC); a prospective longitudinal birth cohort

|                                 |                                                                                                                                                                                                                                                                                                                                                                                                                                                                                                                                                                                                                                                                                                                                                                                                                                                                                                                                                                                                                                                                                                                             |
|---------------------------------|-----------------------------------------------------------------------------------------------------------------------------------------------------------------------------------------------------------------------------------------------------------------------------------------------------------------------------------------------------------------------------------------------------------------------------------------------------------------------------------------------------------------------------------------------------------------------------------------------------------------------------------------------------------------------------------------------------------------------------------------------------------------------------------------------------------------------------------------------------------------------------------------------------------------------------------------------------------------------------------------------------------------------------------------------------------------------------------------------------------------------------|
| Journal:                        | <i>BMJ Open</i>                                                                                                                                                                                                                                                                                                                                                                                                                                                                                                                                                                                                                                                                                                                                                                                                                                                                                                                                                                                                                                                                                                             |
| Manuscript ID                   | bmjopen-2020-043559.R2                                                                                                                                                                                                                                                                                                                                                                                                                                                                                                                                                                                                                                                                                                                                                                                                                                                                                                                                                                                                                                                                                                      |
| Article Type:                   | Cohort profile                                                                                                                                                                                                                                                                                                                                                                                                                                                                                                                                                                                                                                                                                                                                                                                                                                                                                                                                                                                                                                                                                                              |
| Date Submitted by the Author:   | 20-Jan-2021                                                                                                                                                                                                                                                                                                                                                                                                                                                                                                                                                                                                                                                                                                                                                                                                                                                                                                                                                                                                                                                                                                                 |
| Complete List of Authors:       | Jamieson, Lisa M.; The University of Adelaide Faculty of Health and Medical Sciences, Australian Research Centre for Population Oral Health<br>Hedges, Joanne; Australian Research Centre for Population Oral Health, The University of Adelaide<br>Ju, X; Australian Research Centre for Population Oral Health, The University of Adelaide<br>Kapellas, Kostas; Australian Research Centre for Population Oral Health, The University of Adelaide,<br>Leane, Cathy; Women's and Children's Health Network, South Australian Government<br>Haag, Dandara; The University of Adelaide, Australian Research Centre for Population Oral Health (ARCPOH), Adelaide Dental School; The University of Adelaide, Better Start Child Health and Development Research Group, School of Public Health<br>Santiago, Pedro; Australian Research Centre for Population Oral Health, The University of Adelaide<br>Macedo, Davi; Australian Research Centre for Population Oral Health, The University of Adelaide<br>Roberts, Rachel; University of Adelaide, School of Psychology<br>Smithers, Lisa; University of Adelaide, Australia |
| <b>Primary Subject Heading</b>: | Epidemiology                                                                                                                                                                                                                                                                                                                                                                                                                                                                                                                                                                                                                                                                                                                                                                                                                                                                                                                                                                                                                                                                                                                |
| Secondary Subject Heading:      | Dentistry and oral medicine, Epidemiology, Paediatrics                                                                                                                                                                                                                                                                                                                                                                                                                                                                                                                                                                                                                                                                                                                                                                                                                                                                                                                                                                                                                                                                      |
| Keywords:                       | Community child health < PAEDIATRICS, PUBLIC HEALTH, EPIDEMIOLOGY                                                                                                                                                                                                                                                                                                                                                                                                                                                                                                                                                                                                                                                                                                                                                                                                                                                                                                                                                                                                                                                           |
|                                 |                                                                                                                                                                                                                                                                                                                                                                                                                                                                                                                                                                                                                                                                                                                                                                                                                                                                                                                                                                                                                                                                                                                             |

SCHOLARONE™  
Manuscripts



I, the Submitting Author has the right to grant and does grant on behalf of all authors of the Work (as defined in the below author licence), an exclusive licence and/or a non-exclusive licence for contributions from authors who are: i) UK Crown employees; ii) where BMJ has agreed a CC-BY licence shall apply, and/or iii) in accordance with the terms applicable for US Federal Government officers or employees acting as part of their official duties; on a worldwide, perpetual, irrevocable, royalty-free basis to BMJ Publishing Group Ltd ("BMJ") its licensees and where the relevant Journal is co-owned by BMJ to the co-owners of the Journal, to publish the Work in this journal and any other BMJ products and to exploit all rights, as set out in our [licence](#).

The Submitting Author accepts and understands that any supply made under these terms is made by BMJ to the Submitting Author unless you are acting as an employee on behalf of your employer or a postgraduate student of an affiliated institution which is paying any applicable article publishing charge ("APC") for Open Access articles. Where the Submitting Author wishes to make the Work available on an Open Access basis (and intends to pay the relevant APC), the terms of reuse of such Open Access shall be governed by a Creative Commons licence – details of these licences and which [Creative Commons](#) licence will apply to this Work are set out in our licence referred to above.

Other than as permitted in any relevant BMJ Author's Self Archiving Policies, I confirm this Work has not been accepted for publication elsewhere, is not being considered for publication elsewhere and does not duplicate material already published. I confirm all authors consent to publication of this Work and authorise the granting of this licence.



1  
2 Cohort Profile: South Australian Aboriginal Birth Cohort (SAABC); a prospective  
3  
4 longitudinal birth cohort  
5  
6

7 BMJ Open  
8  
9

10 Lisa Jamieson<sup>1,\*</sup>

11 Joanne Hedges<sup>1</sup>

12 Xiangqun Ju<sup>1</sup>

13 Kostas Kapellas<sup>1</sup>

14 Cathy Leane<sup>2</sup>

15 Dandara Haag<sup>1</sup>

16 Pedro Ribeiro<sup>1</sup>

17 Davi Macedo<sup>1</sup>

18 Rachel Roberts<sup>3</sup>

19 Lisa Smithers<sup>4</sup>  
20  
21  
22  
23  
24  
25  
26  
27

28 1. Australian Research Centre for Population Oral Health

29 Adelaide Dental School

30 University of Adelaide

31 Adelaide, Australia  
32  
33  
34  
35

36 2. Women's and Children's Health Network

37 South Australian Government

38 Adelaide

39 South Australia, Australia  
40  
41  
42  
43

44 3. School of Psychology

45 University of Adelaide

46 Adelaide, Australia  
47  
48  
49  
50

51 4. School of Public Health

52 University of Adelaide

53 Adelaide, Australia  
54  
55  
56  
57

58 \*Corresponding author: Lisa Jamieson, [lisa.jamieson@adelaide.edu.au](mailto:lisa.jamieson@adelaide.edu.au)  
59  
60

1  
2 ABSTRACT:  
3  
4

5  
6 PURPOSE: The South Australian Aboriginal Birth Cohort (SAABC) is a prospective, longitudinal  
7 birth cohort established to: (1) estimate Aboriginal child dental disease compared with population  
8 estimates; (2) determine the efficacy of an early childhood caries intervention in early versus late  
9 infancy; (3) examine if efficacy was sustained over time and; (4) document factors influencing  
10 social, behavioural, cognitive, anthropometric, dietary and educational attainment over time.  
11  
12  
13  
14

15  
16 PARTICIPANTS: The original SAABC comprised 449 women pregnant with an Aboriginal child  
17 recruited Feb 2011 to May 2012. At child age 2 years, 324 participants were retained (74%), at age  
18 3 years, 324 participants were retained (74%) and at age 5 years, 299 participants were retained  
19 (69%). Fieldwork for follow-up at age 7 years is underway, with funding available for follow-up at  
20 age 9 years.  
21  
22  
23  
24

25  
26 FINDINGS TO DATE: At baseline, 53% of mothers were aged 14-24 years and 72% had high  
27 school or less educational attainment. At age 3 years, dental disease experience was higher among  
28 children exposed to the intervention later rather than earlier in infancy. The effect was sustained at  
29 age 5 years, but rates were still higher than general child population estimates. Experiences of  
30 racism were high among mothers, with impacts on both tooth brushing and toothache. Compared  
31 with population estimates, levels of self-efficacy and self-rated oral health of mothers at baseline  
32 were low.  
33  
34  
35  
36  
37  
38  
39

40  
41 FUTURE PLANS: Our data has contributed to a better understanding of the environmental,  
42 behavioural, dietary, biological and psychosocial factors contributing to Aboriginal child oral and  
43 general health, and social and emotional wellbeing. This is beneficial in charting the trajectory of  
44 cohort participants' health and wellbeing overtime, particularly in identifying antecedents of  
45 chronic diseases which are highly prevalent among Aboriginal Australians. Funding for continued  
46 follow-up of the cohort will be sought.  
47  
48  
49  
50

51  
52 REGISTRATION: ACTRN12611000111976.  
53  
54  
55  
56  
57  
58  
59  
60

1  
2 STRENGTHS AND LIMITATIONS OF THIS STUDY:  
3

- 4 ● One of the largest, most contemporary Aboriginal Birth Cohorts in Australia (indeed, of an  
5 Indigenous population in the world), that recruited during pregnancy and that will have follow-ups  
6 at five key time-points (child age 2 years, 3 years, 5 years, 7 years (data currently being collected)  
7 and 9 years (funding available)).  
8  
9 ● Established Aboriginal Reference Group who provide governance and oversight of all study  
10 processes, strong rapport with South Australian Aboriginal community and excellent participant  
11 retention.  
12  
13 ● There are very few insights into Aboriginal child development stemming from prospective  
14 longitudinal birth cohorts; our richly characterised and representative information is able to answer  
15 questions that Aboriginal communities want answered with respect to Aboriginal child health and  
16 development.  
17  
18 ● Small sample size (n=449) due to the small sampling pool who were eligible during recruitment.  
19  
20 ● Follow-up at age 7 years has been impacted due to social distancing restrictions necessitated by  
21 the COVID-19 pandemic. This may impact our age 9 years follow-up also.  
22  
23  
24  
25  
26  
27  
28  
29  
30  
31  
32  
33  
34  
35  
36  
37  
38  
39  
40  
41  
42  
43  
44  
45  
46  
47  
48  
49  
50  
51  
52  
53  
54  
55  
56  
57  
58  
59  
60

## INTRODUCTION

Untreated dental caries (tooth decay) in children may cause substantial pain and have severe consequences on eating, sleeping, playing, learning and general quality of life.<sup>1</sup> It is associated with other chronic childhood conditions such as malnutrition, and is the strongest predictor of poor oral health in adulthood.<sup>2</sup> Childhood caries is entirely preventable, yet Indigenous Australian children experience high prevalence of the disease, with Indigenous children in some areas having up to 5 times the prevalence of their non-Indigenous counterparts.<sup>3</sup> In the 2012-14 National Child Oral Health Survey, the mean number of decayed, missing or filled tooth surfaces in the primary dentition of Indigenous children aged 5 to 10 years was 6.3 compared with 2.9 among non-Indigenous children.<sup>4</sup>

Provision of dental care to young Indigenous children can pose many challenges because of child stage of emotional and physical development, and consequent capacity for co-operation in the dental chair. The issues are multiplied for Indigenous children in rural and remote locations, where access to dental care is severely limited. Hospital-based treatment under general anaesthetic is an increasingly utilised mode of dental treatment for such children, with Indigenous Australian children having twice the rate of hospital admissions for dental care than non-Indigenous children.<sup>5</sup> However, dental treatment under general anaesthetic does not prevent the occurrence of new dental decay, with children frequently re-admitted for hospital-based dental general anaesthetic after their initial treatment.<sup>6</sup> Oral rehabilitation under general anaesthetic also does little to alleviate dental fear or to change non-cooperative behaviour and may, in fact, heighten these characteristics. Moreover, comprehensive dental care under general anaesthetic is not without risk, including the potential for long-term adverse neuro-developmental effects.<sup>7-9</sup> Dental general anaesthetics are extremely expensive for the tax-payer and community more broadly, and require considerable time and financial investments from carers (to transport child to hospital, stay overnight, ensure fasting prior to operation etc). The estimated mean cost of dental general anaesthetics for Indigenous children is substantially higher than the cost of care for non-Indigenous children.<sup>7</sup> Preventive approaches that can be undertaken in the homes or Aboriginal Community Controlled Health Organisations of Indigenous children to reduce the number of children undergoing dental general anaesthetics is thus urgently required.

Regrettably, Australian Aboriginal children score worse on almost every indicator of general health and well-being relative to their non-Aboriginal counterparts. There is a higher prevalence of nutrition-related stunting, non-optimal blood pressure and growth outcomes<sup>10</sup> and poorer social and emotional wellbeing.<sup>11</sup> Around one-fifth of Aboriginal children are overweight or obese,<sup>12</sup> and

1  
2 around 30% may not be exercising at recommended levels.<sup>11</sup> Little is known about the dietary  
3 patterns of Aboriginal children but there is some evidence of low rates of fruit, vegetables, water  
4 and milk consumption.<sup>13</sup> The literature suggests that many of the conditions experienced in  
5 Aboriginal childhood are antecedents to chronic disease in later life. Recent studies have shown that  
6 growth in childhood, especially rapid weight gain around 4-5 years, is associated with increased risk  
7 of being overweight,<sup>14</sup> elevated blood pressure, clustered metabolic risk,<sup>15</sup> coronary events<sup>16</sup> and  
8 stroke.<sup>17</sup> Data suggest that individuals who are small in the first 2 years of life and subsequently  
9 gain weight rapidly present the highest levels of risk. Evidence from a recent national report on the  
10 Australian Early Development Census, which contained information on almost 290,000 5-year old  
11 Australian children, indicated that almost half the Aboriginal children were developmentally  
12 vulnerable on one or more of the 5 domains (physical, social, emotional, cognitive/language and  
13 communication). This was more than twice the proportion of non-Aboriginal children.<sup>18</sup>

## 24 METHODS

### 25 STUDY DESIGN

26 The South Australian Aboriginal Birth Cohort study was established in 2011 to provide direct  
27 estimates of Aboriginal child dental disease in South Australia compared with general population  
28 estimates, to determine if an intervention aiming to reduce prevalence of early childhood caries was  
29 more effective in early versus late infancy, to examine if these differences were sustained over time,  
30 and to document social, behavioural, cognitive, anthropometric, dietary and educational attainment  
31 over time. Funding was originally received in 2011 to establish the cohort and to follow-up at child  
32 ages 2 and 3 years.<sup>19</sup> Further funding was received to follow-up the children at age 5 years, with  
33 current funding received to follow-up the children at age 7 years (currently suspended due to  
34 COVID-19 restrictions) and 9 years.

35 At baseline, 449 women pregnant with an Aboriginal child were recruited and randomly allocated  
36 to either an immediate intervention (n=223) or delayed intervention group (n=225) (Figure 1). The  
37 immediate intervention group received the following:

38  
39  
40  
41  
42  
43  
44  
45  
46  
47  
48  
49  
50  
51  
52 1. Dental care to pregnant mothers: Mothers who were allocated randomly to the immediate  
53 intervention arm and who were eligible for publically-funded dental care (through ownership of a  
54 means-tested Government health care card) received dental care through the South Australian  
55 Dental Service (SADS). Study staff organised transport and appointments, through assistance from  
56 SADS's Aboriginal Liaison Program. Six private dentists provided care to participants who were  
57 not eligible for publically-funded care. Dental care included x-rays, check-ups, scale and  
58  
59  
60

1  
2 prophylaxis, fillings and extractions (including wisdom teeth). Not provided were cosmetic  
3 dentistry, endodontics and orthodontics.  
4  
5  
6

7 2. Fluoride varnish applied at child ages 6, 12 and 18 months: The protocol for fluoride varnish was  
8 based on that used by Slade and colleagues.<sup>20</sup> Study staff were trained in its use and applied it.  
9 Children were supine, with their teeth cleaned and dried with gauze. Fluoride varnish was applied  
10 from the back teeth first, before moving forward to the front teeth. Children (through their carers)  
11 were advised to not eat food or drink for half an hour.  
12  
13  
14  
15  
16

17 3. Anticipatory Guidance: Oral health educational packages that were tailored to contain dental-  
18 specific information relevant for pregnant mothers (focus on dental treatment, pregnancy gingivitis)  
19 and when children were aged 6 months (focus on first solids, caring for baby teeth upon initial  
20 eruption), 12 months (focus on tooth brushing and fluoride, avoiding sugar-containing beverages  
21 and foods) and 18 months (focus on child's first dental check-up, molar teeth eruption).  
22  
23  
24  
25  
26

27 4. Motivational interviewing (MI): In combination with anticipatory guidance, motivational  
28 interviewing was implemented with pregnant mothers and at child ages 6, 12 and 18 months. Study  
29 staff completed an initial two-day MI training course, followed by an intensive one-day follow-up.  
30 One-day follow-up training was continued monthly for six months. This was followed by one-day  
31 coaching every two months, with occasional telephone coaching, for a further year. Each MI  
32 session was conducted on a one-to-one basis in venues where participants felt comfortable (for  
33 example, community halls, local Aboriginal health services, participants' homes). MI sessions  
34 ranged from 30 to 90 minutes. Pictorial prompts and plain English summaries were used.<sup>21</sup> A  
35 member of the Motivational Interviewing Network of Trainers conducted the fidelity testing of the  
36 MI sessions, which was found to be acceptable.<sup>22</sup>  
37  
38  
39  
40  
41  
42  
43  
44  
45  
46

47 When children were aged 24 months, delayed intervention group mothers received dental care.  
48 Fluoride varnish application, anticipatory guidance and motivational interviewing for delayed  
49 intervention participants were delivered when children were aged 24, 30 and 36 months,  
50 respectively.  
51  
52  
53

#### 54 *Statistical Analysis:*

55 Intention-to-treat principles have been used for all data analyses to estimate the effect of the  
56 intervention on dental caries experience. General linear regression models were used to compare the  
57 efficacy of the intervention on mean number of decayed, missing and filled teeth (dmft) between  
58  
59  
60

1  
2 immediate and delayed intervention groups at child age five years. To account for any contributing  
3 factors, we adjusted for baseline maternal socio-demographic, health status and dental behaviour  
4 characteristics. The ‘Proc genmod’ function was used in SAS, with link=identity and  
5 distribution=normal, so GLM could be fitted and the least squares estimates obtained. Because, at  
6 age 5 years, nearly one-third of mother-child pairs were lost to follow-up, a Fully Conditional  
7 Specification method was used to impute missing data, based on the assumption that data was  
8 missing at random (MAR). Immediate and delayed intervention groups were imputed separately.  
9 Fifty imputed datasets were created using 50 iterations, with the results from the imputed datasets  
10 combined using Rubin’s rules via the ‘Proc mianalyse’ function. Sensitivity analyses were  
11 conducted using the ‘MNAR adjust statement’, with different scenarios for dental outcomes, which  
12 included different percentages of MAR assumptions and maximum and minimum value  
13 imputations. SAS statistical software (SAS 9.4, SAS Institute Inc., Cary, NC, USA) was used for all  
14 analysis and imputation.  
15  
16  
17  
18  
19  
20  
21  
22  
23  
24  
25

## 26 COHORT DESCRIPTION

27 *Who is in the cohort?* This prospective birth cohort study was developed in partnership with local  
28 Aboriginal communities and endorsed by the study’s Aboriginal Reference Group. Ethical  
29 approvals were received from the University of Adelaide Human Research Ethics Committee (H-  
30 057-2010), the Aboriginal Health Council of South Australia (04-09-362), the South Australian  
31 Department for Health, including the human research ethics committees of participating South  
32 Australian hospitals (Flinders Medical Centre: 435-10; Lyell McEwin Hospital: 2010-160; and the  
33 Women’s and Children’s Hospital: REC2322/11/13). Participants provided signed informed  
34 consent. Participants were 449 women pregnant with an Aboriginal child who were residing in  
35 South Australia during the recruitment period of February 2011 to May 2012. Recruitment was  
36 through the antenatal clinics of South Australian Aboriginal Community Controlled Health  
37 Organisations and hospitals. The sample represented two-thirds of those who were eligible during  
38 the recruitment period, and was representative by age, socio-economic position and tobacco  
39 smoking status.<sup>23</sup> One child passed away in utero and a further 12 passed away before their 2<sup>nd</sup>  
40 birthday. At child age 2 years, 324 participants were followed up (74% retention; Figure 1). At age  
41 3 years, 324 participants were followed up (74% retention). At age 5 years, 299 participants were  
42 followed up (69% retention).  
43  
44  
45  
46  
47  
48  
49  
50  
51  
52  
53  
54  
55

56  
57 *How often have they been followed up?* Participants were recruited during pregnancy (baseline) and  
58 have been followed up at child mean ages 2, 3, 5 and 7 years (currently suspended due to COVID-  
59 19). Baseline and loss to follow-up sample characteristics are shown for pregnancy and child ages  
60

1  
2 2, 3 and 5 years in Table 1. At baseline, over half (53%) of mothers were aged 14 to 24 years and  
3 72% had achieved high school or less as their highest educational attainment. Around 86% received  
4 their income from Centrelink (Government agency who provide welfare based on means testing)  
5 and 82% owned a health-care card (means-tested, allows access to some health services, for  
6 example, dental public health services that otherwise incur out-of-pocket expenses). Around 61%  
7 resided in non-metropolitan locations and almost two-thirds (64%) usually visit a dentist because of  
8 a problem. Three-quarters (75%) of mothers reported brushing their teeth the previous day and  
9 while 55% rated their oral health as fair or poor, only 10% rated their general health as fair or poor.  
10 A higher proportion of participants who were not followed-up at child ages two, three and five  
11 years had (at baseline) lower educational attainment, received their income from Centrelink, owned  
12 a healthcare card, resided in metropolitan locations, usually visited a dentist because of a problem,  
13 did not brush their teeth the previous day, rated their oral health as fair or poor and rated their  
14 general health as fair or poor.  
15  
16  
17  
18  
19  
20  
21  
22  
23  
24  
25

26 *What has been measured?* Broad categories of variables collected at baseline and each follow-up  
27 phase are provided in Table 2, with more detail of these variables provided in Table 3. Most items  
28 have been based on those used in other national surveys of child health in Australia, for example,  
29 the Longitudinal Study of Indigenous Children and the National Child Oral Health Survey. Data  
30 linkage to government repositories has been approved and is currently underway, with participant  
31 consent. Details of the government linkage datasets is provided in Table 4. Self-report  
32 questionnaires were completed with the assistance of trained research officers if required. Dental  
33 examinations were standardised and conducted by three calibrated dental professionals. Procedures  
34 appropriate for young children were used when children were aged 2 years and 3 years, for  
35 example, in the 'knee-to-knee' position on their carer's lap. Before examinations, teeth were dried  
36 with cotton pads. Standard infection control procedures were followed and a fibre-optic light used  
37 as a light source. Diagnosis was based on visual criteria only. Any child diagnosed with carious  
38 lesions was referred for dental care through the South Australian Dental Service (provided free of  
39 charge). Weight was measured in duplicate to the nearest 0.1 kg using Seca model 803 scales and  
40 averaged. If measures differed by  $>0.2$  kg, a third measure was taken and the average of the two  
41 closest values used in analyses. Height was measured in duplicate to the nearest 1 mm using a Seca  
42 model 213 portable stadiometer, using a standard anthropometric procedure. If measures differed by  
43  $>5$  mm a third measurement was taken and the average of the closest two used in analyses. Blood  
44 pressure was measured using a portable oscillometric device (Omron HEM-7211) and a cuff  
45 selected to suit the child's mid-upper arm circumference using a standard protocol.  
46  
47  
48  
49  
50  
51  
52  
53  
54  
55  
56  
57  
58  
59  
60



1  
2 PATIENT AND PUBLIC INVOLVEMENT: The study's Aboriginal Reference Group has been  
3 involved in the design, governance and general oversight of all phases of the research to date.  
4 Study participants have been encouraged to communicate to the research team through Facebook  
5 and other social media platforms. Newsletters and community presentations are frequently shared  
6 with participants and relevant key stakeholder groups. Members of the study's Aboriginal  
7 Reference Group have presented the study findings at international conferences.  
8  
9  
10  
11  
12

13  
14 FINDINGS TO DATE: The prevalence of mothers who were pregnant with their first child at  
15 baseline was 38.5%. Rates of dental disease among Aboriginal children in South Australia were less  
16 among those exposed to the intervention earlier rather than later in childhood.<sup>24, 25</sup> The effect  
17 appeared to be sustained at age 5 years, although the rates of dental disease were still far higher than  
18 estimates reported in Australia's National Child Oral Health Survey 2012-14.<sup>26</sup> Rates of  
19 psychosocial stress among mothers pregnant with Aboriginal children were high compared with  
20 general Australian population estimates.<sup>27</sup> Experiences of racism were high among mothers, with  
21 impacts on tooth brushing behaviours<sup>28</sup> and experience of toothache.<sup>29</sup> Compared with population  
22 estimates, levels of self-efficacy and self-rated oral health of study participants at baseline were  
23 low,<sup>30</sup> with differences in the frame of reference regarding participants' self-rated oral health and  
24 self-rated general health described.<sup>31</sup> Smithers and colleagues reported that the proportion of total  
25 energy from discretionary foods (including sugars in discretionary foods) was far higher for study  
26 children at age 3 years than for non-Aboriginal Australian children.<sup>32</sup> Haag and others described  
27 how breastfeeding >24 months was associated with higher dental caries prevalence at child age 3  
28 years compared with children who were never breastfed.<sup>33</sup> This is contrary to the many findings that  
29 support prolonged breastfeeding among Indigenous Australians for better child health outcomes.  
30 Santiago and colleagues demonstrated how social support was characterised among study  
31 participants,<sup>34</sup> and the impact of personal control on self-reported health outcomes.<sup>35</sup> The  
32 effectiveness of implementing a motivational interviewing approach to preventing poor oral health  
33 among Indigenous children and their families was discussed,<sup>22</sup> with comparisons made with other  
34 studies involving motivational interviewing and the oral health of vulnerable children.<sup>36</sup>  
35  
36  
37  
38  
39  
40  
41  
42  
43  
44  
45  
46  
47  
48  
49  
50

51  
52 STRENGTHS AND LIMITATIONS: The main strength of the study is the Aboriginal community  
53 engagement, involvement and partnership, orchestrated through the study's Aboriginal Reference  
54 Group, through the Aboriginal Community Controlled Health Organisation stakeholder groups and  
55 by the Senior Aboriginal research officer (JH). This has, without doubt, contributed to the excellent  
56 follow-up rates, which need to be taken into context. For example, this cohort study has been  
57 undertaken over vast distances (e.g. travelling 700 km to the west of South Australia, 400 km east,  
58  
59  
60

1  
2 800 km north), involving highly disadvantaged participants who have not always enjoyed positive  
3  
4 research interactions. The fact that participants represented two-thirds of those eligible to be  
5  
6 recruited during the recruitment period demonstrates the widespread community support and  
7  
8 generalisability of the results. The main limitation is the small sample size, which was essentially  
9  
10 limited by the small population size of Aboriginal people in South Australia (around 2% of the total  
11  
12 population). That we were able to recruit two thirds of those who were eligible at baseline (and have  
13  
14 had strong retention of participants since) suggests that had the target population size been larger at  
15  
16 baseline, the sample size of our study would consequently also be larger. Participants reported that  
17  
18 the dietary recalls (collected at child age 2 years) were burdensome and this may have increased  
19  
20 non-response or socially desirable responses. At the time of writing, follow-up at age 7 years was  
21  
22 suspended due to social distancing restrictions necessitated by the COVID-19 pandemic. This may  
23  
24 impact our age 9 years follow-up also.

25  
26 CONTRIBUTORSHIP STATEMENT: Conceptualization, LMJ, JH, XJ, KK, CL, DH, PR, DM,  
27  
28 RR, LS; methodology, XJ, DH, LS, LMJ; resources, LMJ; data curation, LMJ, JH, XJ, KK, CL,  
29  
30 DH, PR, DM, RR, LS; writing—original draft preparation, LMJ; writing—review and editing, JH,  
31  
32 XJ, KK, CL, DH, PR, DM, RR, LS; visualization, LMJ, JH, XJ, KK, CL, DH, PR, DM, RR, LS. All  
33  
34 authors have read and agreed to the published version of the manuscript.

35  
36 COMPETING INTERESTS: The authors declare no competing interests  
37

38  
39 FUNDING: This study was funded by the National Health and Medical Research Council of  
40  
41 Australia (NHMRC, Project Grants 627350 and 1153662) and a Channel 7 Children's Research  
42  
43 Foundation grant (10547012). LMJ is supported by a NHMRC Senior Research Fellowship.  
44

45  
46 DATA SHARING STATEMENT: Study data are not freely available because of ethical and data  
47  
48 protection constraints. The de-identified data are stored at the University of Adelaide and cannot be  
49  
50 sent outside the institution.

51  
52 COLLABORATIONS: Proposals for possible collaborations in further analyses of the data should  
53  
54 be addressed to Lisa Jamieson ([lisa.jamieson@adelaide.edu.au](mailto:lisa.jamieson@adelaide.edu.au)) and will be reviewed by the  
55  
56 SAABC research team and Aboriginal Reference Group.  
57

58  
59 ACKNOWLEDGEMENTS: The authors gratefully acknowledge the support of the South  
60  
Australian Aboriginal Birth Cohort study participants, study staff and partners: South Australian

1  
2 Dental Service, Colgate Palmolive, Women's and Children's Hospital, Lyell McEwen Hospital,  
3 Flinders' Medical Centre, Aboriginal Family Support Services, Aboriginal Primary Health Unit,  
4 Metro Aboriginal Family Birthing Program, Kura Yerlo Centre, Aboriginal Legal Rights  
5 Movement, Wodlitanattoai Program, Ninko Kutangga Patpangga, Kanggawodli Step Down Service,  
6 Kaurna Plains, Fleurieu Families, Gilles Plains Community Health, MADEC Community Support  
7 Services, Naporendi Aboriginal Forum, Nunga MiMinar, Aboriginal Strategy Unit of Families  
8 South Australia, Inbarendi College, Para West Adult Campus, Pangula Mannanurna Aboriginal  
9 Health Corporation and the Muno Parra Medical Centre, Second Story, Inner Southern Health  
10 Service, The Corner House, Louise Place, PARKS, Talking Realities Program, Child Youth  
11 Women's Health Services, Southern Junction Community Services, TAFE campuses, GP Plus  
12 centres, employment programs, childcare centres, women's centres, domestic violence shelters, and  
13 primary and high schools.  
14  
15  
16  
17  
18  
19  
20  
21  
22  
23  
24  
25  
26  
27  
28  
29  
30  
31  
32  
33  
34  
35  
36  
37  
38  
39  
40  
41  
42  
43  
44  
45  
46  
47  
48  
49  
50  
51  
52  
53  
54  
55  
56  
57  
58  
59  
60

1  
2 **FIGURE LEGEND:**

3  
4 **Figure 1: Flow diagram of participants through key stages of the study**

5  
6 Intervention comprised: (1) dental care to mother; (2) Anticipatory guidance (mother); 3) Motivational  
7 interviewing (mother) and; (4) Fluoride varnish application (child).

8  
9 Intervention delivered during pregnancy to child aged 18 months for immediate intervention group, at child  
10 aged 24 to 36 months for delayed intervention group.  
11  
12  
13  
14  
15  
16  
17  
18  
19  
20  
21  
22  
23  
24  
25  
26  
27  
28  
29  
30  
31  
32  
33  
34  
35  
36  
37  
38  
39  
40  
41  
42  
43  
44  
45  
46  
47  
48  
49  
50  
51  
52  
53  
54  
55  
56  
57  
58  
59  
60

For peer review only

1  
2 REFERENCES

- 3  
4 1. Peres MA, Macpherson LMD, Weyant RJ, Daly B, Venturelli R, Mathur MR, Listl S, Celeste  
5 RK, Guarnizo-Herreño CC, Kearns C, Benzian H, Allison P, Watt RG. Oral diseases: a global  
6 public health challenge. *Lancet*. 2019;**394**:249-260.  
7  
8  
9  
10 2. Isaksson H, Alm A, Koch G, Birkhed D, Wendt LK. Caries prevalence in Swedish 20-year-olds  
11 in relation to their previous caries experience. *Caries Res*. 2013; **47**:234-242.  
12  
13  
14  
15 3. Jamieson LM, Armfield JM, Roberts-Thomson KF. Oral health inequalities among indigenous  
16 and nonindigenous children in the Northern Territory of Australia. *Community Dent Oral*  
17 *Epidemiol*. 2006; **34** :267-276.  
18  
19  
20  
21  
22 4. Do LG, Spencer AJ. *Oral health of Australian children: the National Child Oral Health Study*  
23 *2012–14*. Adelaide: University of Adelaide Press, 2016.  
24  
25  
26  
27 5. Australian Institute of Health and Welfare. *Oral health and dental care in Australia: key facts*  
28 *and figures trends 2014*. Canberra: AIHW; 2014.  
29  
30  
31  
32  
33 6. Tahmassebi JF, Achol LT, Fayle SA. Analysis of dental care of children receiving  
34 comprehensive care under general anaesthesia at a teaching hospital in England. *Eur Arch Paediatr*  
35 *Dent* 2014;**15**:353–360.  
36  
37  
38  
39  
40 7. Alsharif AT, Kruger E, Tennant M. A population-based cost description study of oral treatment  
41 of hospitalized Western Australian children aged younger than 15 years. *J Public Health Dent*  
42 2015;**75**:202–209.  
43  
44  
45  
46  
47 8. Lee HH, Milgrom P, Starks H, Burke W. Trends in death associated with pediatric dental  
48 sedation and general anesthesia. *Paediatr Anaesth* 2013;**23**:741-746.  
49  
50  
51  
52 9. Ing C, DiMaggio C, Whitehouse A, Hegarty MK, Brady J, von Ungern-Sternberg BS, Davidson  
53 A, Wood AJ, Li G, Sun LS. Long-term differences in language and cognitive function after  
54 childhood exposure to anesthesia. *Pediatrics* 2012;**130**; e476-e485.  
55  
56  
57  
58  
59  
60

- 1  
2 10. Haysom L, Williams R, Hodson EM, Lopez-Vargas PA, Roy LP, Lyie DM, Craig JC. Natural  
3 history of chronic kidney disease in Australian Indigenous and non-Indigenous children: a 4-year  
4 population-based follow-up study. *Med J Aust*. 2009;190:303-306.  
5  
6  
7  
8  
9 11. Blair EM, Zubrick SR, Cox AH. The Western Australian Aboriginal Child Health Survey:  
10 findings to date on adolescents. *Med J Aust*. 2005; 183:433-435.  
11  
12  
13  
14 12. Heath DL, Panaretto KS. Nutrition status of primary school children in Townsville. *Aust J*  
15 *Rural Health*. 2005; 13:282-289.  
16  
17  
18  
19 13. Zubrick SR, Lawrence DM, Silburn SR, Blair E, Milroy H, Wilkes T, Eades S, D'Antoine H,  
20 Read A, Ishiguchi P, Doyle S. The Western Australian Aboriginal Child Health Survey: The Health  
21 of Aboriginal Children and Young People. Perth: Telethon Institute for Child Health Research.  
22 2004.  
23  
24  
25  
26  
27  
28 14. Victora CG, Adair L, Fall C, Hallal PC, Martorell R, Richter L, Sachdev HS. Maternal and  
29 child undernutrition: consequences for adult health and human capital. *Lancet* 2008; **371**:340–357.  
30  
31  
32  
33 15. Ekelund UIF, Ong KK, Linne Y, Neovius M, Brage S, Dunger DB, Wareham NJ, Rossner S.  
34 Association of weight gain in infancy and early childhood with metabolic risk in young adults. *J*  
35 *Clin Endocrinol Metab* 2007;**92**:98–103.  
36  
37  
38  
39  
40 16. Barker DJP, Osmond C, Forsen TJ, Kajantie E, Eriksson JG. Trajectories of growth among  
41 children who have coronary events as adults. *N Engl J Med* 2005; **353**:1802–1809.  
42  
43  
44  
45 17. Osmond C, Kajantie E, Forsen TJ, Eriksson JG, Barker DJP. Infant growth and stroke in adult  
46 life: the Helsinki birth cohort study. *Stroke* 2007; **38**:264–270.  
47  
48  
49  
50 18 Australian Government Department of Education. *Australian Early Development Census*  
51 *National Report 2018*. Canberra: Australian Government Department of Education, 2019.  
52  
53  
54  
55 19. Merrick J, Chong A, Parker E, Roberts-Thomson K, Misan G, Spencer J, Broughton  
56 J, Lawrence H, Jamieson L. Reducing disease burden and health inequalities arising from chronic  
57 disease among Indigenous children: an early childhood caries intervention. *BMC Public*  
58 *Health*. 2012;12:323.  
59  
60

- 1  
2  
3  
4 20. Slade GD, Bailie RS, Roberts-Thomson K, Leach AJ, Raye I, Endean C. Effect of health  
5 promotion and fluoride varnish on dental caries among Australian Aboriginal  
6 children: results from a community-randomized controlled trial. *Community Dent*  
7 *Oral Epidemiol* 2011; 39:29–43.  
8  
9  
10  
11  
12 21. Venner KL, Feldstein SW, Tafoya N. Native American motivational interviewing: weaving  
13 native American and western practices. Albuquerque: University of New Mexico, Center on  
14 Alcoholism, Substance Abuse and Addictions, Department of Psychology; 2006.  
15  
16  
17  
18  
19 22. Jamieson L, Bradshaw J, Lawrence H, et al. Fidelity of motivational interviewing in an early  
20 childhood caries intervention involving indigenous Australian mothers. *J Health Care Poor*  
21 *Underserved* 2016;27: 125–38.  
22  
23  
24  
25  
26 23. Government of South Australia. *Pregnancy Outcome in South Australia 2011*. Adelaide:  
27 Government of South Australia; 2013.  
28  
29  
30  
31 24. Jamieson L, Smithers L, Hedges J, Parker E, Mills H, Kapellas K, Lawrence HP, Broughton JR,  
32 Ju X. Dental Disease Outcomes Following a 2-Year Oral Health Promotion Program for Australian  
33 Aboriginal Children and Their Families: A 2-Arm Parallel, Single-blind, Randomised Controlled  
34 Trial. *EClinicalMedicine*. 2018; 1:43-50.  
35  
36  
37  
38  
39  
40 25. Jamieson LM, Smithers LG, Hedges J, Aldis J, Mills H, Kapellas K, Lawrence HP, Broughton  
41 JR, Ju X. Follow-up of an Intervention to Reduce Dental Caries in Indigenous Australian Children:  
42 A Secondary Analysis of a Randomized Clinical Trial. *JAMA Netw Open*. 2019;2: e190648.  
43  
44  
45  
46  
47 26. Jamieson L, Smithers L, Hedges J, Mills H, Kapellas K, Ha D, Do L, Ju X. Follow-up of  
48 Intervention to Prevent Dental Caries Among Indigenous Children in Australia: A Secondary  
49 Analysis of a Randomized Clinical Trial. *JAMA Netw Open*. 2019;2:e1915611.  
50  
51  
52  
53  
54 27. Santiago PHR, Roberts R, Smithers LG, Jamieson L. Stress beyond coping? A Rasch analysis  
55 of the Perceived Stress Scale (PSS-14) in an Aboriginal population. *PLoS One*. 2019;14: e0216333.  
56  
57  
58  
59  
60

- 1  
2 28. Ben J, Jamieson LM, Priest N, Parker EJ, Roberts-Thomson KF, Lawrence HP, Broughton J,  
3 Paradies Y. Experience of racism and tooth brushing among pregnant Aboriginal Australians:  
4 exploring psychosocial mediators. *Community Dent Health*. 2014b; 31:145  
5  
6  
7  
8  
9 29. Ben J, Paradies Y, Priest N, Parker EJ, Roberts-Thomson KF, Lawrence HP, Broughton J,  
10 Jamieson LM. Self-reported racism and experience of toothache among pregnant Aboriginal  
11 Australians: the role of perceived stress, sense of control, and social support. *J Public Health Dent*.  
12 2014b; 74:301-9.  
13  
14  
15  
16  
17 30. Jamieson LM, Parker EJ, Roberts-Thomson KF, Lawrence HP, Broughton J. Self-efficacy and  
18 self-rated oral health among pregnant aboriginal Australian women. *BMC Oral Health*. 2014;  
19 14:29.  
20  
21  
22  
23  
24 31. Chand R, Parker E, Jamieson L. Differences in, and Frames of Reference of, Indigenous  
25 Australians' Self-rated General and Oral Health. *J Health Care Poor Underserved*. 2017; 28:1087-  
26 1103.  
27  
28  
29  
30  
31 32. Smithers LG, Lynch J, Hedges J, Jamieson LM. Diet and anthropometry at 2 years of age  
32 following an oral health promotion programme for Australian Aboriginal children and their carers:  
33 a randomised controlled trial. *Br J Nutr*. 2017; 118:1061-1069.  
34  
35  
36  
37  
38 33. Haag DG, Jamieson LM, Hedges J, Smithers LG. Is There an Association between  
39 Breastfeeding and Dental Caries among Three-Year-Old Australian Aboriginal Children? *Nutrients*.  
40 2019;11.  
41  
42  
43  
44  
45 34. Santiago PHR, Roberts R, Smithers LG, Jamieson L. Networks of support: psychometric  
46 properties of the Social Support Scale (SSS) in two Aboriginal samples. *Australian and New*  
47 *Zealand Journal of Psychiatry*. In Press.  
48  
49  
50  
51  
52 35. Santiago PHR, Nielsen T, Roberts R, Smithers LG, Jamieson L. Sense of Personal Control: can  
53 it be assessed fairly across Aboriginal and non-Aboriginal Australians? *PloS One*. In Press.  
54  
55  
56  
57 36. Jamieson LM, Garcia RI, Sohn W, Albino J. Challenges and Solutions for Improved Oral  
58 Health: Examples from Motivational Interviewing Trials. *JDR Clin Trans Res*. 2020;5:107-108.  
59  
60



Table 1. Baseline and follow-up/loss to follow-up characteristics at child age 2 years, 3 years and 5 years

|                                   | Baseline<br>(pregnancy)<br>(n=448) | Child age 2<br>years follow-up<br>(n=324) | Child age 2 years<br>loss to follow-up<br>(n=112) | Child age 3<br>years follow-up<br>(n=324) | Child age 3 years<br>loss to follow-up<br>(n=112) | Child age 5<br>years follow-up<br>(n=299) | Child age 5 years<br>loss to follow-up<br>(n=137) |
|-----------------------------------|------------------------------------|-------------------------------------------|---------------------------------------------------|-------------------------------------------|---------------------------------------------------|-------------------------------------------|---------------------------------------------------|
| <b>Maternal age</b>               |                                    |                                           |                                                   |                                           |                                                   |                                           |                                                   |
| 14-24                             | 238 (53.1)                         | 172 (53.1)                                | 66 (53.2)                                         | 173 (53.2)                                | 59 (52.7)                                         | 156 (52.2)                                | 76 (55.5)                                         |
| 25+                               | 210 (46.9)                         | 152 (46.9)                                | 58 (46.8)                                         | 152 (46.8)                                | 53 (47.3)                                         | 143 (47.8)                                | 61 (44.5)                                         |
| <b>Education</b>                  |                                    |                                           |                                                   |                                           |                                                   |                                           |                                                   |
| High school or less               | 322 (72.4)                         | 226 (70.0)                                | 88 (79.3)                                         | 232 (72.1)                                | 82 (73.2)                                         | 203 (68.4)                                | 111 (81.0)                                        |
| Trade or University               | 123 (27.6)                         | 97 (30.0)                                 | 23 (20.7)                                         | 90 (28.0)                                 | 30 (26.8)                                         | 94 (31.7)                                 | 26 (19.0)                                         |
| <b>Income</b>                     |                                    |                                           |                                                   |                                           |                                                   |                                           |                                                   |
| Job                               | 62 (14.0)                          | 56 (17.34)                                | 4 (3.7)                                           | 55 (17.1)                                 | 5 (4.5)                                           | 47 (15.9)                                 | 13 (9.6)                                          |
| Centrelink                        | 381 (86.0)                         | 267 (82.7)                                | 105 (96.3)                                        | 267 (82.9)                                | 106 (95.5)                                        | 249 (84.1)                                | 123 (90.4)                                        |
| <b>HCC status</b>                 |                                    |                                           |                                                   |                                           |                                                   |                                           |                                                   |
| Yes                               | 358 (82.2)                         | 254 (79.9)                                | 95 (89.6)                                         | 252 (79.3)                                | 97 (91.5)                                         | 236 (80.8)                                | 113 (85.6)                                        |
| No                                | 77 (17.8)                          | 64 (20.1)                                 | 11 (10.4)                                         | 66 (20.8)                                 | 9 (8.5)                                           | 56 (19.2)                                 | 19 (14.4)                                         |
| <b>Residential location</b>       |                                    |                                           |                                                   |                                           |                                                   |                                           |                                                   |
| Metropolitan                      | 171 (38.7)                         | 116 (36.3)                                | 55 (45.1)                                         | 116 (36.1)                                | 51 (46.0)                                         | 132 (44.8)                                | 35 (25.7)                                         |
| Non- metropolitan                 | 271 (61.3)                         | 204 (63.8)                                | 67 (54.9)                                         | 205 (63.9)                                | 60 (54.1)                                         | 163 (55.2)                                | 101 (74.3)                                        |
| <b>Usual reason visit dentist</b> |                                    |                                           |                                                   |                                           |                                                   |                                           |                                                   |
| Problem                           | 275 (64.0)                         | 195 (61.9)                                | 72 (69.2)                                         | 194 (62.4)                                | 74 (67.9)                                         | 184 (63.7)                                | 83 (63.8)                                         |
| Check-up                          | 155 (36.1)                         | 120 (38.1)                                | 32 (30.8)                                         | 117 (37.6)                                | 35 (32.1)                                         | 105 (36.3)                                | 47 (36.2)                                         |
| <b>Brush yesterday</b>            |                                    |                                           |                                                   |                                           |                                                   |                                           |                                                   |
| Yes                               | 321 (75.0)                         | 239 (76.0)                                | 74 (69.8)                                         | 240 (77.4)                                | 74 (67.9)                                         | 217 (75.9)                                | 96 (72.7)                                         |
| No                                | 107 (25.0)                         | 73 (23.4)                                 | 32 (30.2)                                         | 70 (22.6)                                 | 35 (32.1)                                         | 69 (24.1)                                 | 36 (27.3)                                         |
| <b>Self-rated oral health</b>     |                                    |                                           |                                                   |                                           |                                                   |                                           |                                                   |
| Excellent, very good or good      | 203 (45.3)                         | 153 (47.2)                                | 43 (38.4)                                         | 151 (46.5)                                | 46 (41.1)                                         | 130 (43.5)                                | 66 (48.2)                                         |
| Fair or poor                      | 245 (54.7)                         | 171 (52.8)                                | 69 (61.6)                                         | 174 (53.5)                                | 66 (58.9)                                         | 169 (56.5)                                | 71 (51.8)                                         |
| <b>Self-rated general health</b>  |                                    |                                           |                                                   |                                           |                                                   |                                           |                                                   |
| Excellent, very good or good      | 402 (89.9)                         | 294 (91.0)                                | 97 (86.6)                                         | 298 (92.0)                                | 94 (83.9)                                         | 272 (91.0)                                | 119 (87.5)                                        |
| Fair or poor                      | 45 (10.1)                          | 29 (9.0)                                  | 15 (13.4)                                         | 26 (8.0)                                  | 18 (16.1)                                         | 27 (9.0)                                  | 17 (12.5)                                         |

Table 2. Broad categories of variables collected at baseline and each follow-up phase

| Phase                  | Measurements                                                                                                                                                                                                                                                                                                                                                                                                                                                                                                                                                                                                                                                                                                                                                  |
|------------------------|---------------------------------------------------------------------------------------------------------------------------------------------------------------------------------------------------------------------------------------------------------------------------------------------------------------------------------------------------------------------------------------------------------------------------------------------------------------------------------------------------------------------------------------------------------------------------------------------------------------------------------------------------------------------------------------------------------------------------------------------------------------|
| Baseline               | Mother self-reported questionnaire <ul style="list-style-type: none"> <li>• Dental treatment needs, oral health-related behaviours, maternal oral self-efficacy, self-rated oral health and oral health related quality of life.</li> <li>• General health conditions, health-related behaviours and self-rated general health.</li> <li>• Socioeconomic and psychosocial factors, including income, education, employment, experience of racism and cultural identity.</li> </ul>                                                                                                                                                                                                                                                                            |
| Child mean age 2 years | Carer self-reported questionnaire <ul style="list-style-type: none"> <li>• Dental treatment needs, oral health-related behaviours, maternal oral health literacy, self-efficacy, dental perceptions, self-rated oral health and oral health related quality of life.</li> <li>• General health conditions (mother and child), health-related behaviours, physical activity, self-rated general health, 24-hour dietary recalls (child), breastfeeding habits.</li> <li>• Socioeconomic and psychosocial factors, including income, education, employment, experience of racism and cultural identity.</li> <li>• Family functioning and home environment</li> </ul> Child height, weight, blood pressure, upper arm circumference<br>Child dental examination |
| Child mean age 3 years | Carer self-reported questionnaire <ul style="list-style-type: none"> <li>• Dental treatment needs, oral health-related behaviours, maternal oral health literacy, self-efficacy, dental perceptions, self-rated oral health and oral health related quality of life.</li> <li>• General health conditions (mother and child), health-related behaviours, physical activity, self-rated general health and dietary habits</li> <li>• Socioeconomic factors.</li> </ul> Child height, weight, blood pressure, upper arm circumference<br>Child dental examination                                                                                                                                                                                               |
| Child mean age 5 years | Carer self-reported questionnaire <ul style="list-style-type: none"> <li>• Dental treatment needs, oral health-related behaviours, maternal oral health literacy, self-efficacy, dental perceptions, self-rated oral health and oral health related quality of life.</li> <li>• General health conditions (mother and child), health-related behaviours, physical activity, self-rated general health and dietary habits.</li> <li>• Socioeconomic factors.</li> <li>• Family functioning and home environment.</li> <li>• Child socioemotional well-being and cognitive outcomes.</li> </ul> Child height, weight, blood pressure, upper arm circumference<br>Child dental examination                                                                       |

|                               |                                                                                                                                                                                                                                                                                                                                                                                                                                                                                                                                                                                                                                                                                                        |
|-------------------------------|--------------------------------------------------------------------------------------------------------------------------------------------------------------------------------------------------------------------------------------------------------------------------------------------------------------------------------------------------------------------------------------------------------------------------------------------------------------------------------------------------------------------------------------------------------------------------------------------------------------------------------------------------------------------------------------------------------|
| <p>Child mean age 7 years</p> | <p>Carer self-reported questionnaire</p> <ul style="list-style-type: none"> <li>• Dental treatment needs, oral health-related behaviours, maternal oral health literacy, self-efficacy, dental perceptions, self-rated oral health and oral health related quality of life.</li> <li>• General health conditions (mother and child), health-related behaviours, physical activity, self-rated general health and dietary habits.</li> <li>• Socioeconomic factors.</li> <li>• Family functioning and home environment.</li> <li>• Child socioemotional well-being and cognitive outcomes.</li> </ul> <p>Child height, weight, blood pressure, upper arm circumference<br/>Child dental examination</p> |
|-------------------------------|--------------------------------------------------------------------------------------------------------------------------------------------------------------------------------------------------------------------------------------------------------------------------------------------------------------------------------------------------------------------------------------------------------------------------------------------------------------------------------------------------------------------------------------------------------------------------------------------------------------------------------------------------------------------------------------------------------|

For peer review only

1  
2  
3  
4  
5  
6  
7  
8  
9  
10  
11  
12  
13  
14  
15  
16  
17  
18  
19  
20  
21  
22  
23  
24  
25  
26  
27  
28  
29  
30  
31  
32  
33  
34  
35  
36  
37  
38  
39  
40  
41  
42  
43  
44  
45  
46  
47  
48  
49  
50  
51  
52  
53  
54  
55  
56  
57  
58  
59  
60

Table 3. Detail of variables collected at baseline and each follow-up phase

|                                                                                        | Baseline<br>(Pregnancy<br>n=449) | 2 years<br>(n=324) | 3 years<br>(n=324) | 5 years<br>(n=299) | 7 years<br>(ongoing) |
|----------------------------------------------------------------------------------------|----------------------------------|--------------------|--------------------|--------------------|----------------------|
| <b>Oral health-related variables</b>                                                   |                                  |                    |                    |                    |                      |
| Dental examinations (child- dental caries, gingivitis, trauma)                         |                                  | ✓                  | ✓                  | ✓                  | ✓                    |
| Dental treatment needs (mother and child)                                              | ✓                                | ✓                  | ✓                  | ✓                  | ✓                    |
| Oral health-related behaviours (oral hygiene habits)                                   | ✓                                | ✓                  | ✓                  | ✓                  | ✓                    |
| Oral health self-efficacy (mother)                                                     | ✓                                | ✓                  | ✓                  | ✓                  |                      |
| Oral health literacy (mother)                                                          |                                  | ✓                  | ✓                  | ✓                  |                      |
| Knowledge of children's oral health (mother)                                           | ✓                                | ✓                  | ✓                  | ✓                  |                      |
| Oral health fatalism (mother and child)                                                | ✓                                | ✓                  | ✓                  | ✓                  |                      |
| Dental perceptions                                                                     |                                  |                    | ✓                  |                    |                      |
| Oral health-related quality of life (mother and child)                                 | ✓                                | ✓                  | ✓                  | ✓                  | ✓                    |
| <b>General health</b>                                                                  |                                  |                    |                    |                    |                      |
| Anthropometric measurements (height weight, arm circumference, blood pressure) (child) |                                  | ✓                  | ✓                  | ✓                  | ✓                    |
| General health conditions and hospitalisations (child)                                 | ✓                                | ✓                  | ✓                  | ✓                  | ✓                    |
| Health-related behaviours (smoking, alcohol intake) (mother)                           | ✓                                | ✓                  | ✓                  | ✓                  | ✓                    |
| Physical activity (child)                                                              |                                  |                    | ✓                  | ✓                  |                      |
| Self-rated general and oral health (mother and child)                                  | ✓                                | ✓                  | ✓                  | ✓                  | ✓                    |
| 24-hour dietary recalls (child)                                                        |                                  | ✓                  |                    |                    |                      |
| Breastfeeding habits (child)                                                           |                                  | ✓                  |                    |                    |                      |
| Other dietary-related habits (mother and child)                                        | ✓                                | ✓                  | ✓                  | ✓                  | ✓                    |
| <b>Socioeconomic and psychosocial factors</b>                                          |                                  |                    |                    |                    |                      |
| Income, education, socioeconomic hardship, employment (mother)                         | ✓                                | ✓                  | ✓                  | ✓                  | ✓                    |
| Experience of Racism (mother)                                                          | ✓                                | ✓                  |                    |                    | ✓                    |

|                                                              |   |   |  |   |   |
|--------------------------------------------------------------|---|---|--|---|---|
| Cultural identity (mother)                                   | ✓ | ✓ |  |   |   |
| Self-stem (child)                                            |   |   |  |   | ✓ |
| Social support and sense of self-control (mother)            | ✓ |   |  |   |   |
| Family functioning and home environment                      |   |   |  |   |   |
| Parental functioning and home environment (mother and child) |   | ✓ |  | ✓ | ✓ |
| Time-use diaries (child)                                     |   |   |  |   | ✓ |
| Child development                                            |   |   |  |   |   |
| Cognitive outcomes (child)                                   |   |   |  | ✓ | ✓ |
| Social and emotional well-being (child)                      |   |   |  | ✓ | ✓ |

Table 4. Datasets to be included in data linkage

| Database domain                                 | Types of information                                                                                                                                |
|-------------------------------------------------|-----------------------------------------------------------------------------------------------------------------------------------------------------|
| Hospital admissions                             | Length of stay, ICD codes describing each hospitalisation event                                                                                     |
| Presentations at hospital emergency departments | Presenting problem, diagnosis                                                                                                                       |
| Well-child health checks                        | Child growth and development collected by nurses at routine health checks and ad hoc visits to local health clinics                                 |
| Perinatal information                           | Medical information about pregnancy and child's birth                                                                                               |
| Public dental care                              | Dental treatments received by child in public dental clinics                                                                                        |
| School Enrolment                                | Information provided by carers at the time the child was enrolled at school including carer education, languages spoken at home and school absences |
| Literacy and Numeracy                           | Results on reading, writing and numeracy collected from a national assessment program when child is in year 3 (approximate age 8) at school         |
| Housing                                         | Information about families living in homes provided by the government                                                                               |

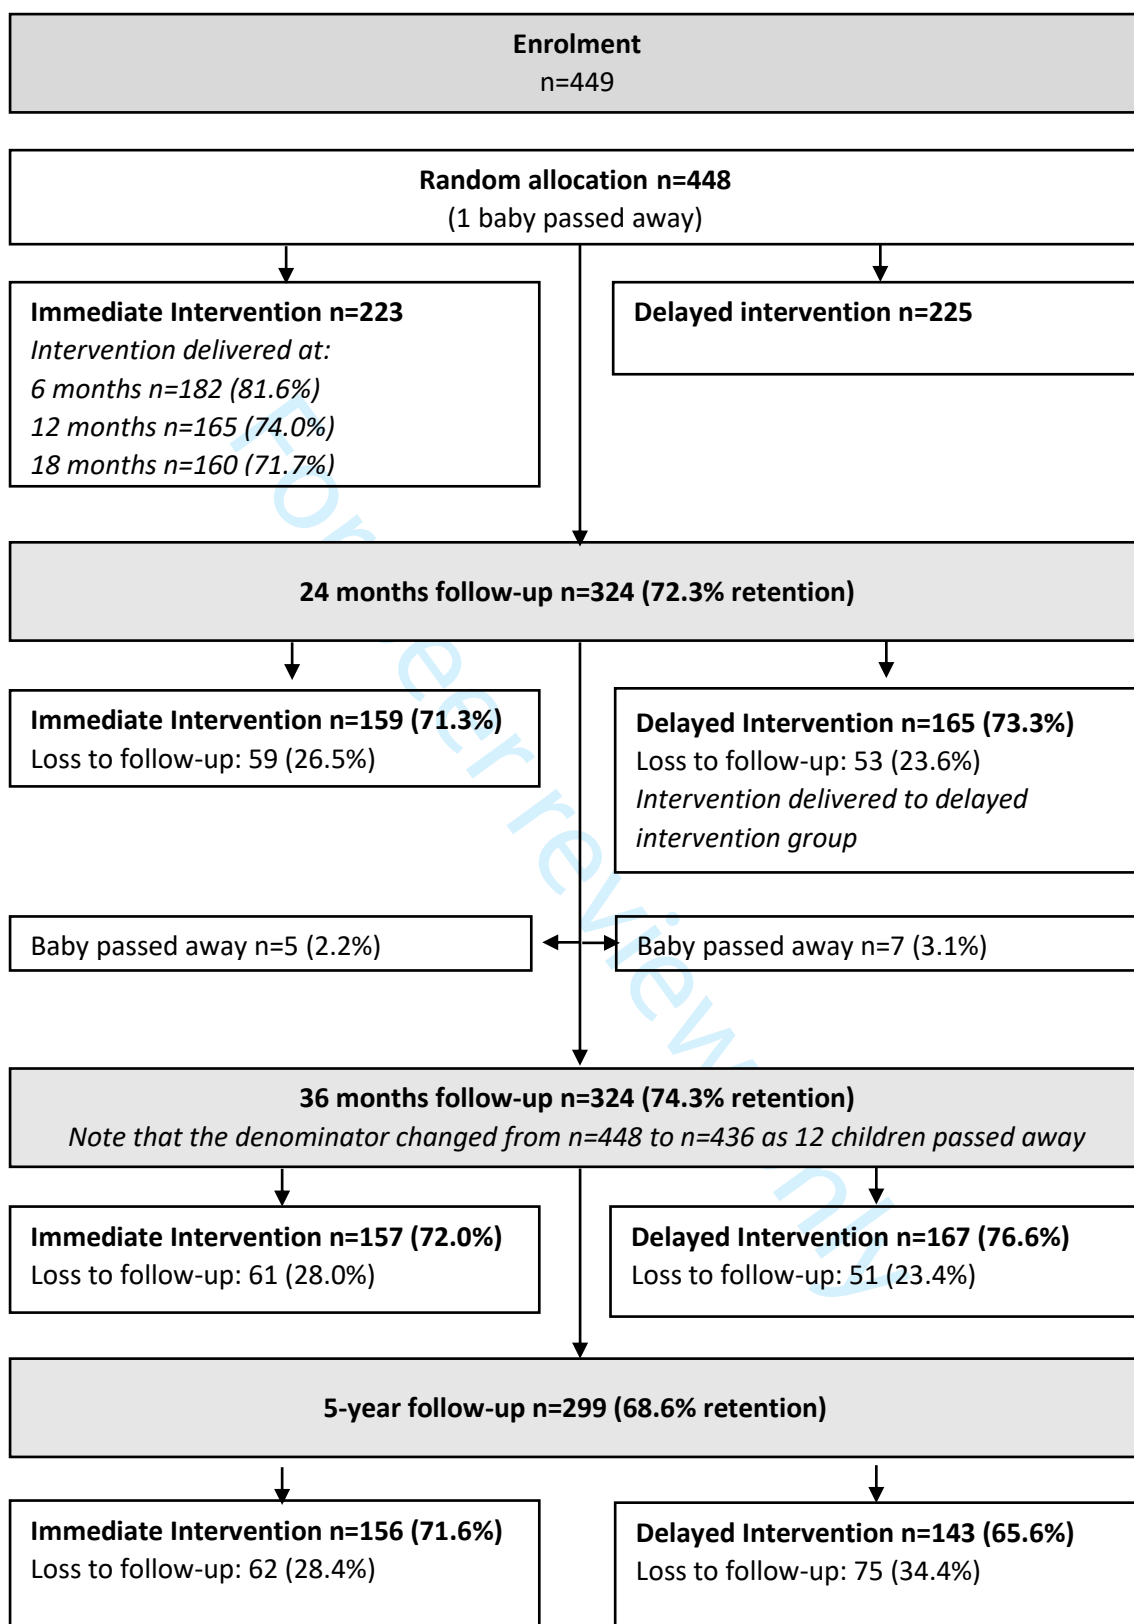

Supplement: bmjopen-2020-043559.draft_revisions.pdf [file bmjopen-2020-043559.draft_revisions.pdf]
